# Supplementary material for: Genomic instability in individuals with sex determination defects and germ cell cancer
Source: PubMed Central journal article supplement (PMC10202957; doi:10.1038/s41420-023-01470-6), 2023-05-23

Some of the membranes were cur and the pieces were processed separately with different antibodies. This allowed us to analyze different markers from the same gel and also save the material.

Figure 1a

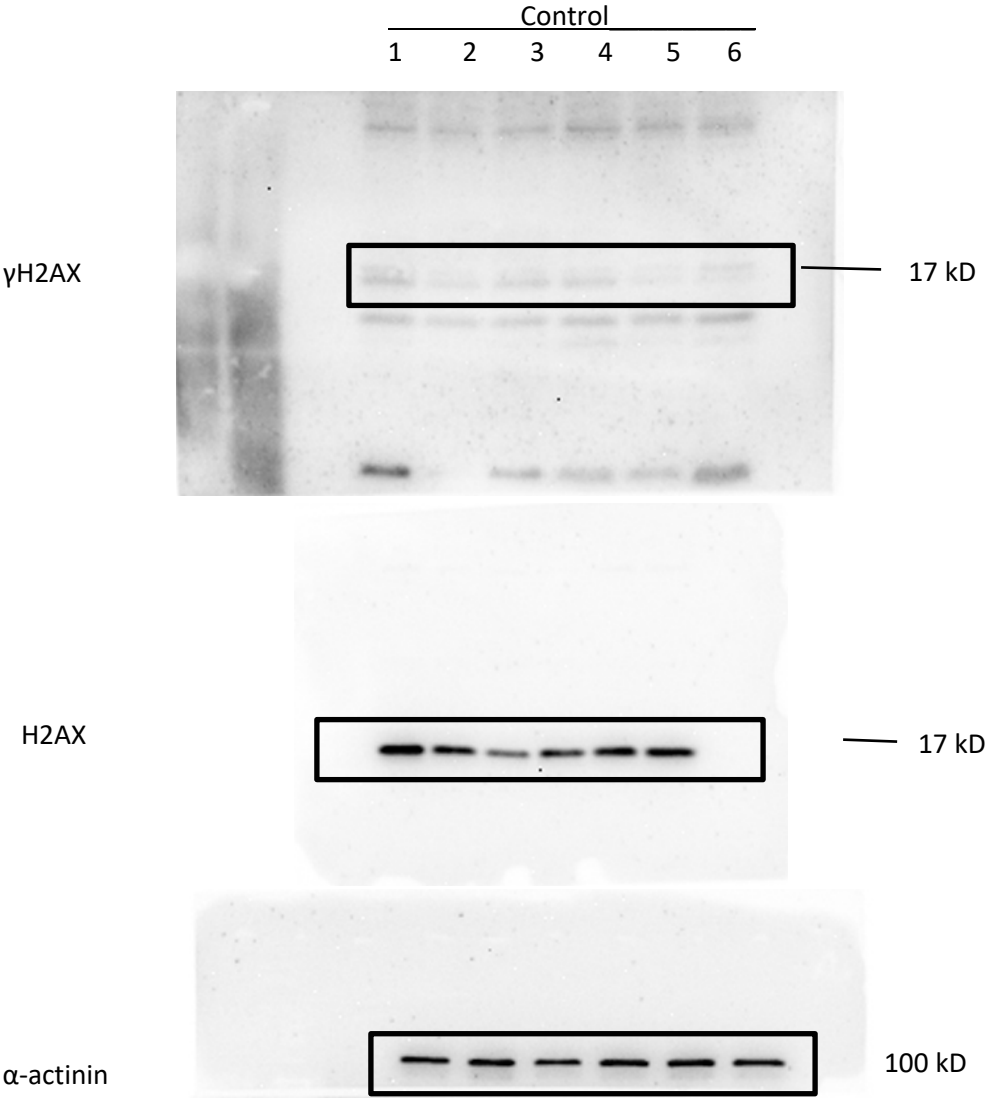

Figure 1b

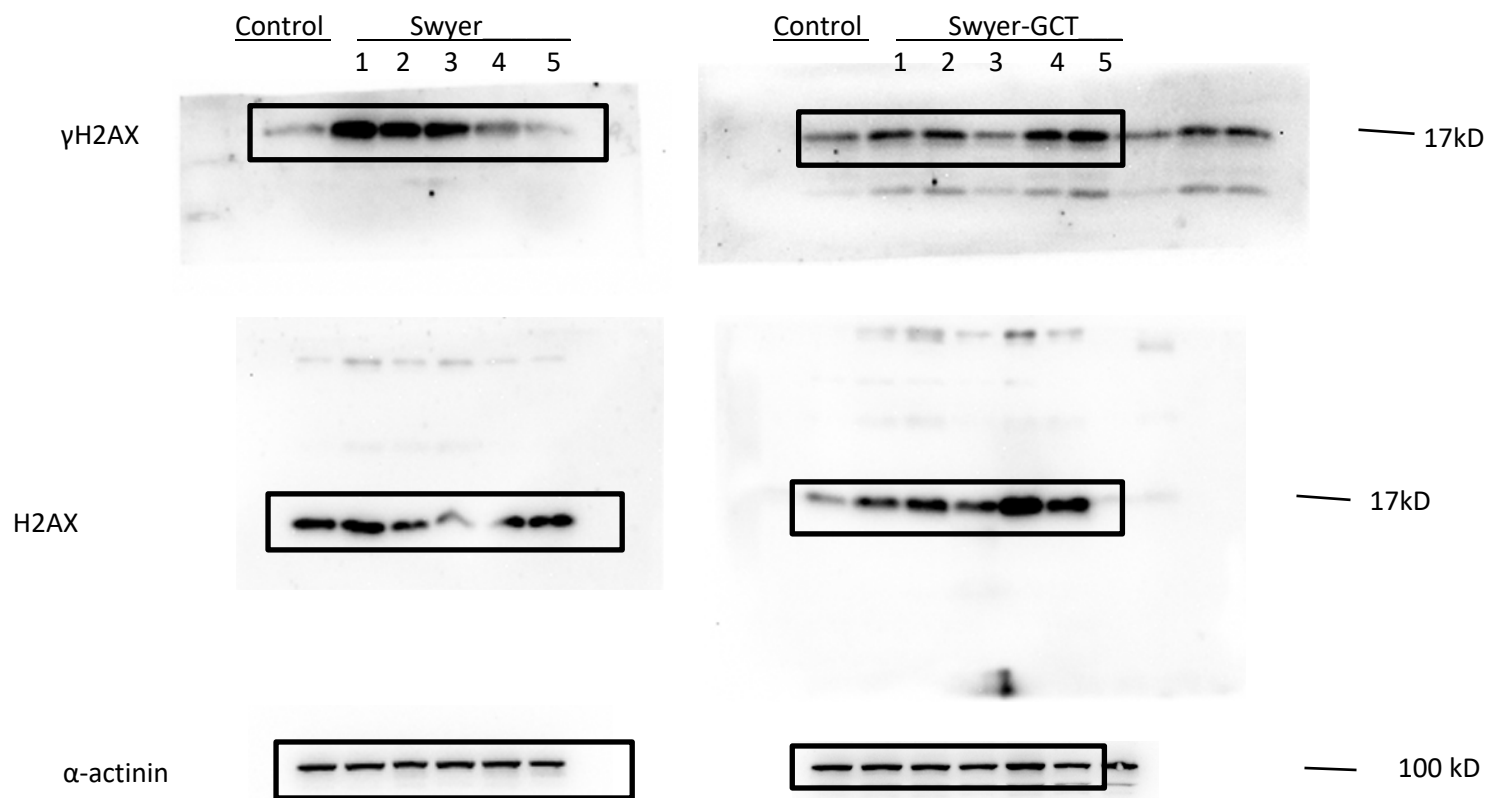

Figure 1d

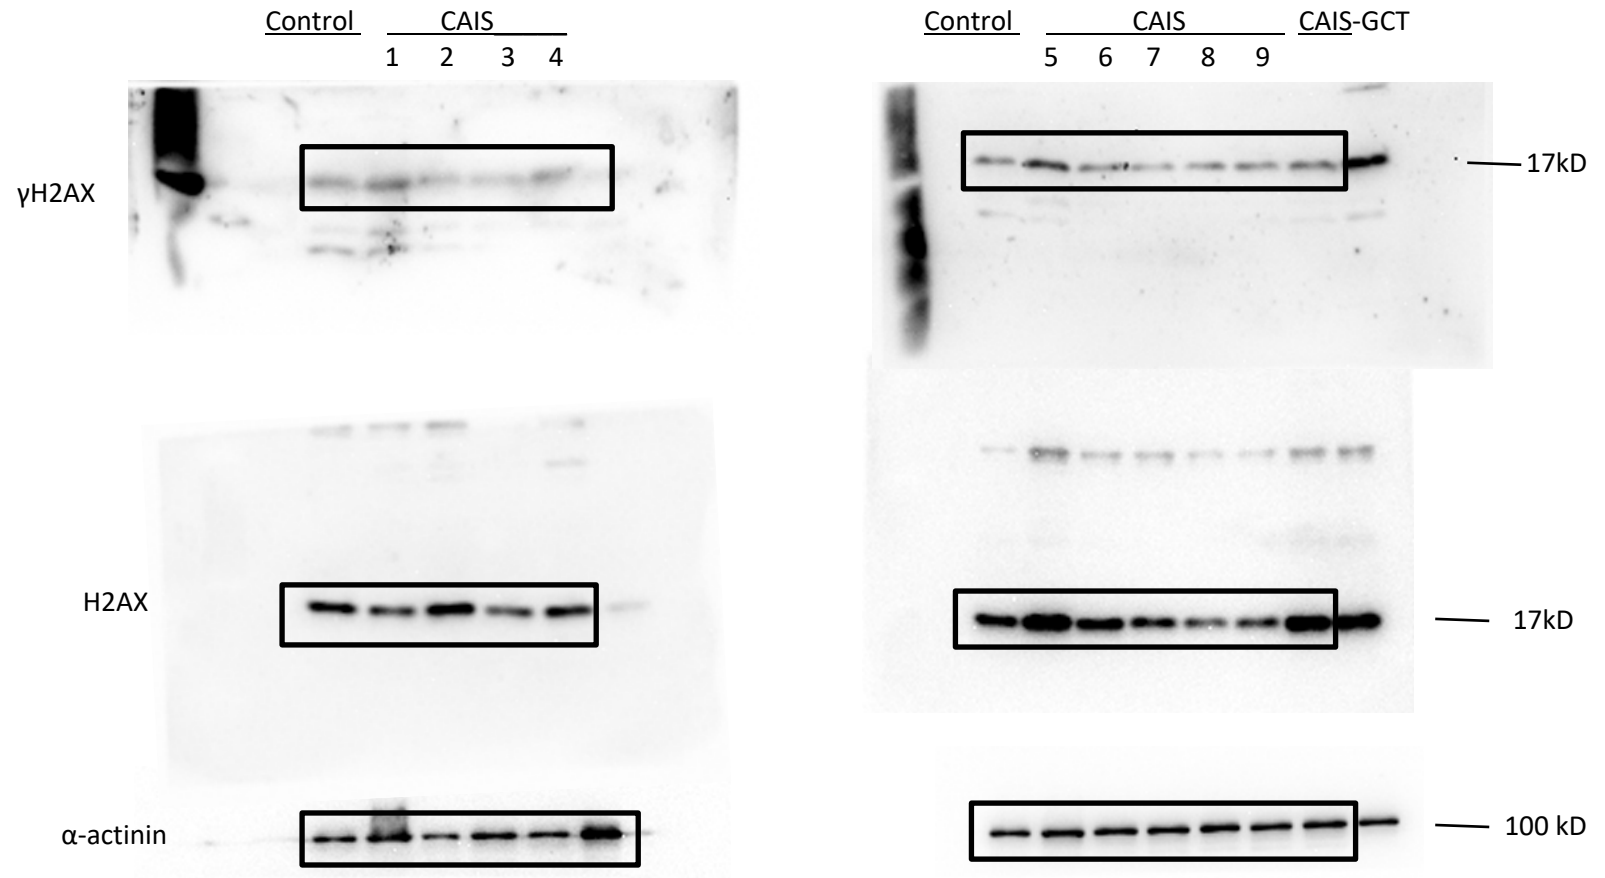

Figure 1e

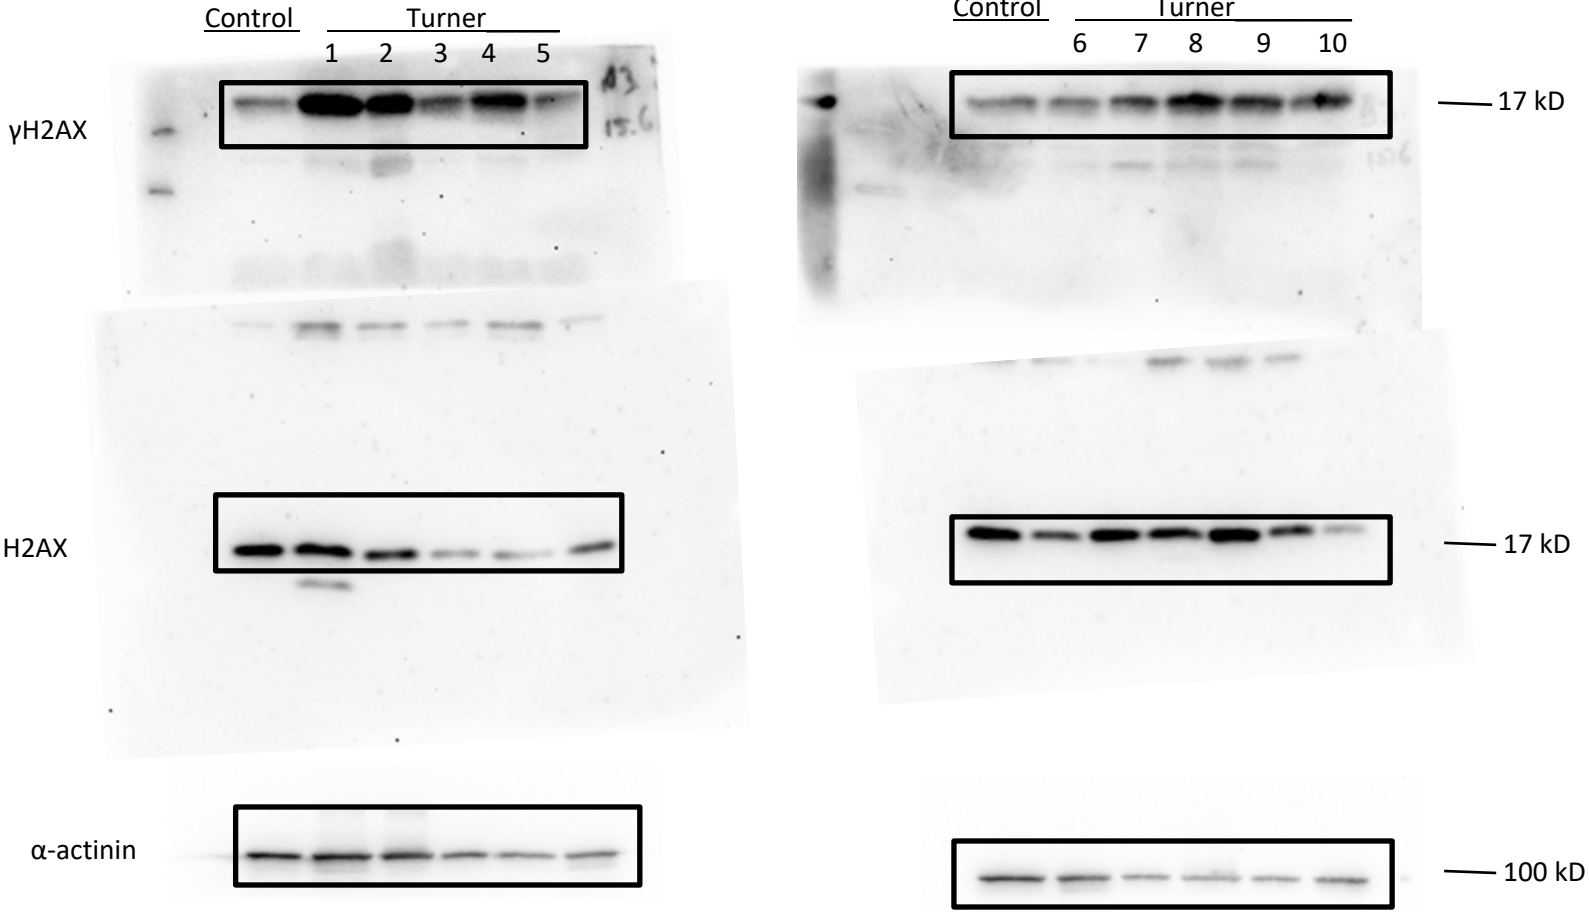

Figure 1f

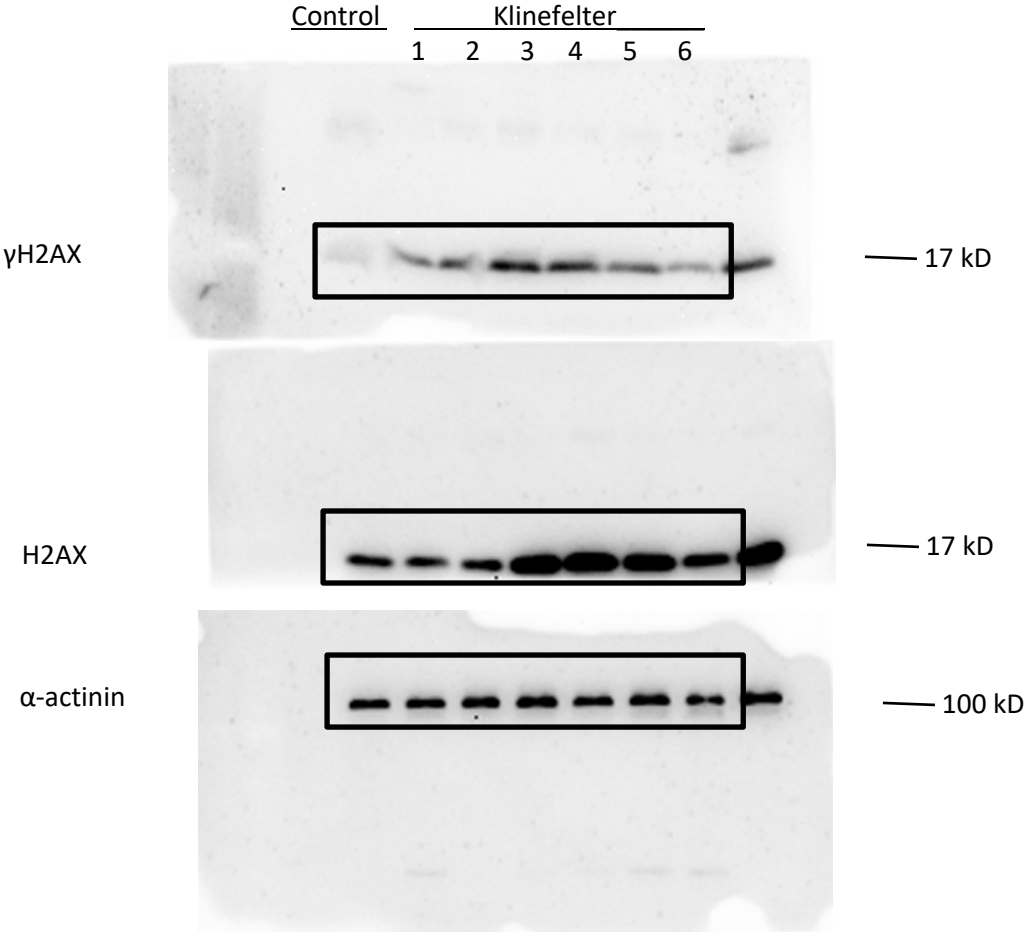

Figure 1i

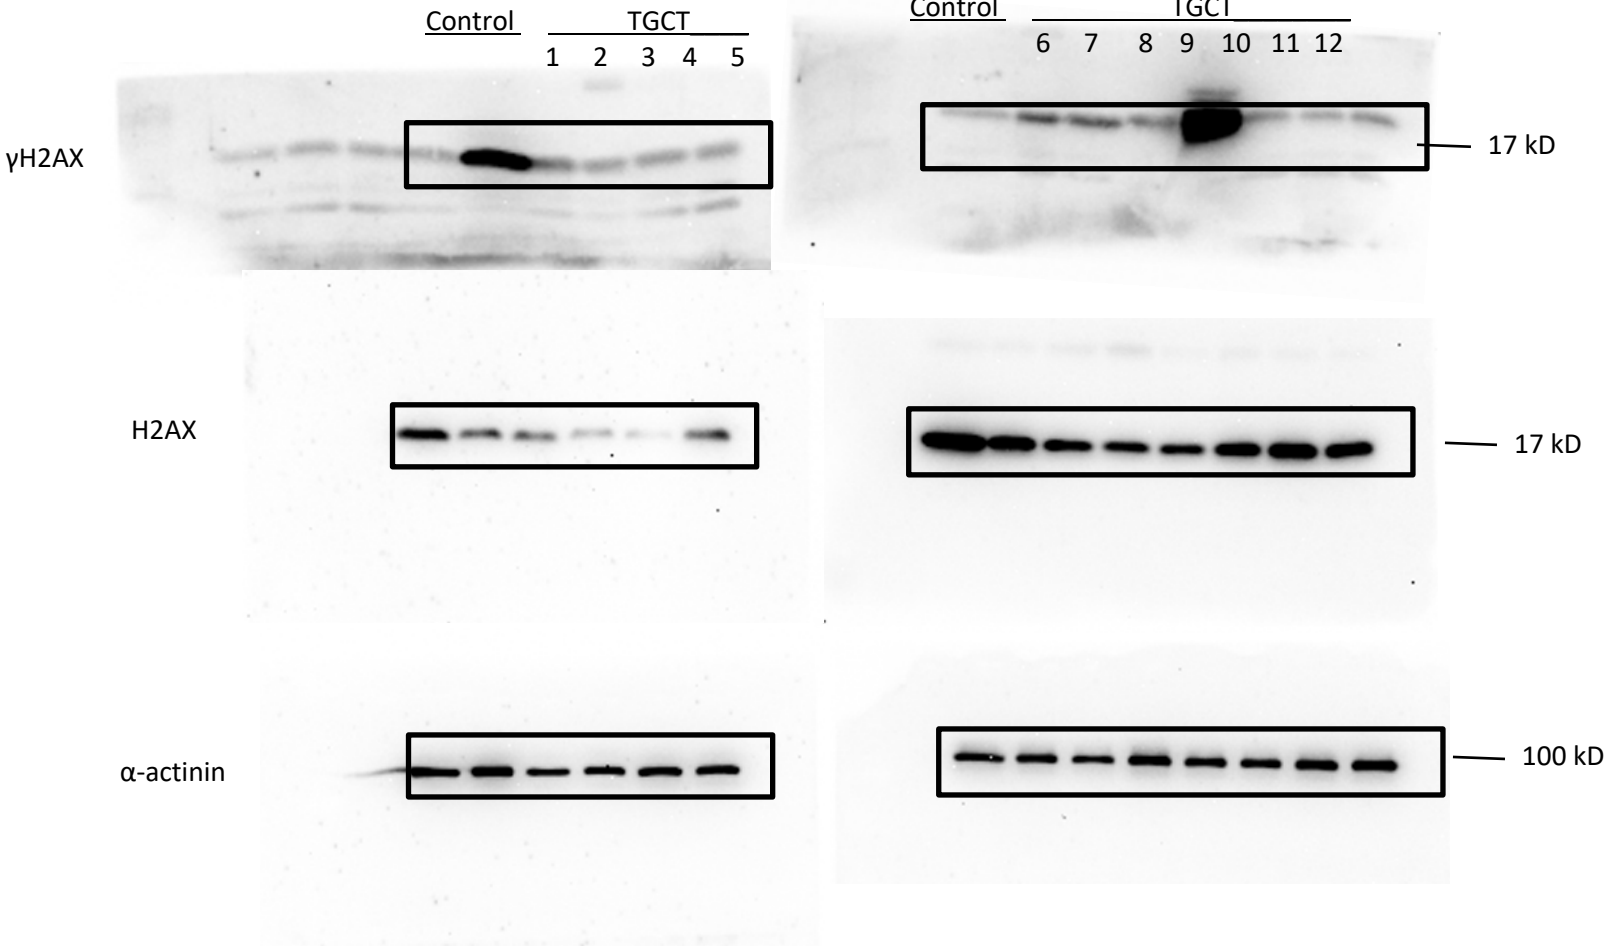

Figure 4f

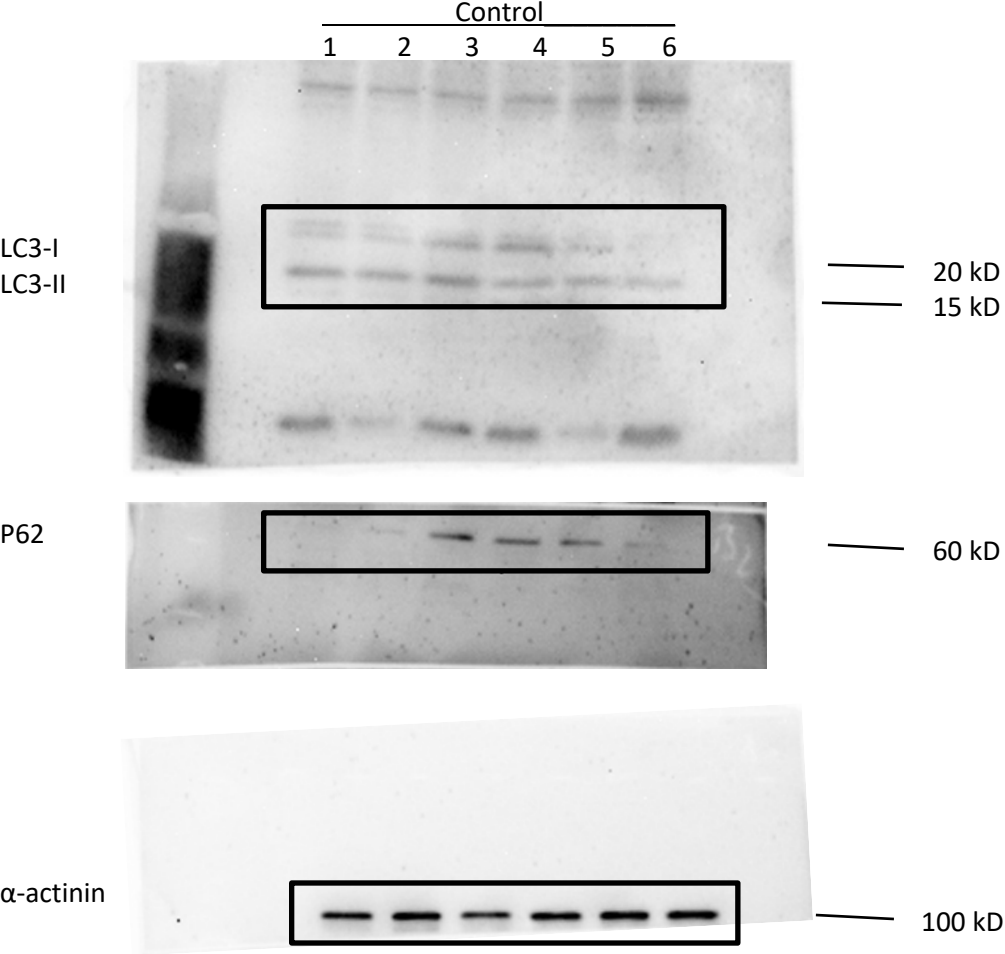





Figure 4h

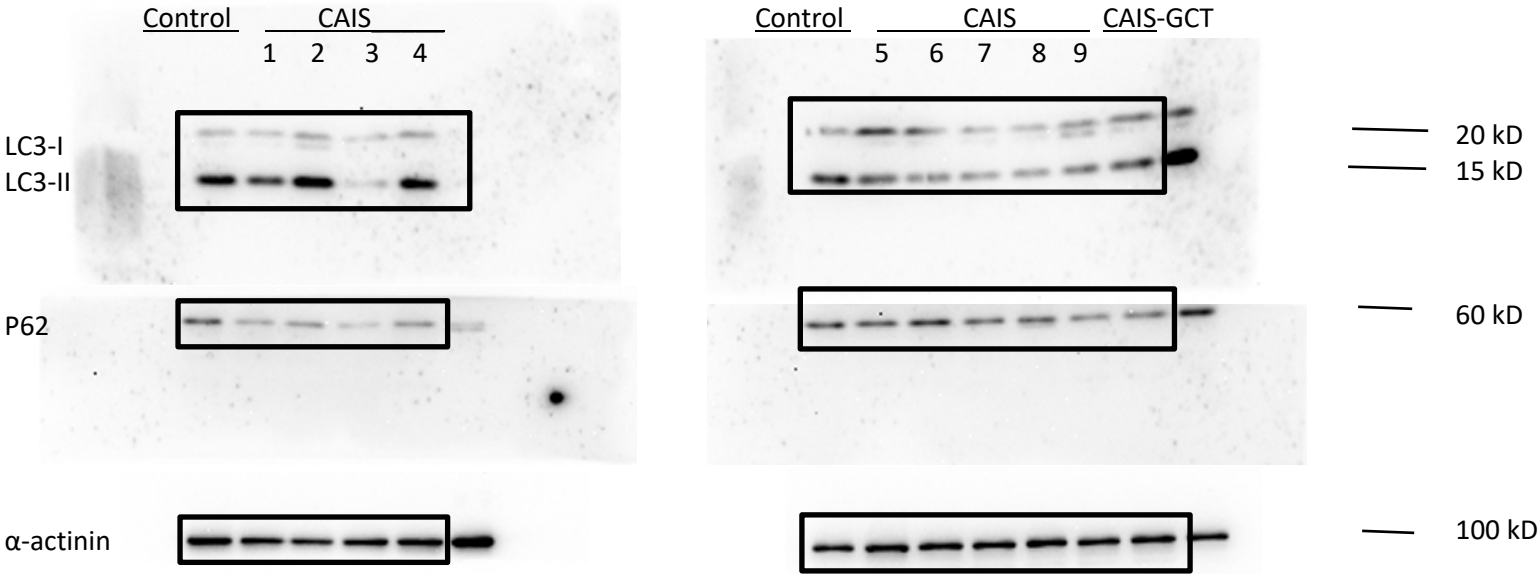

Figure 4i

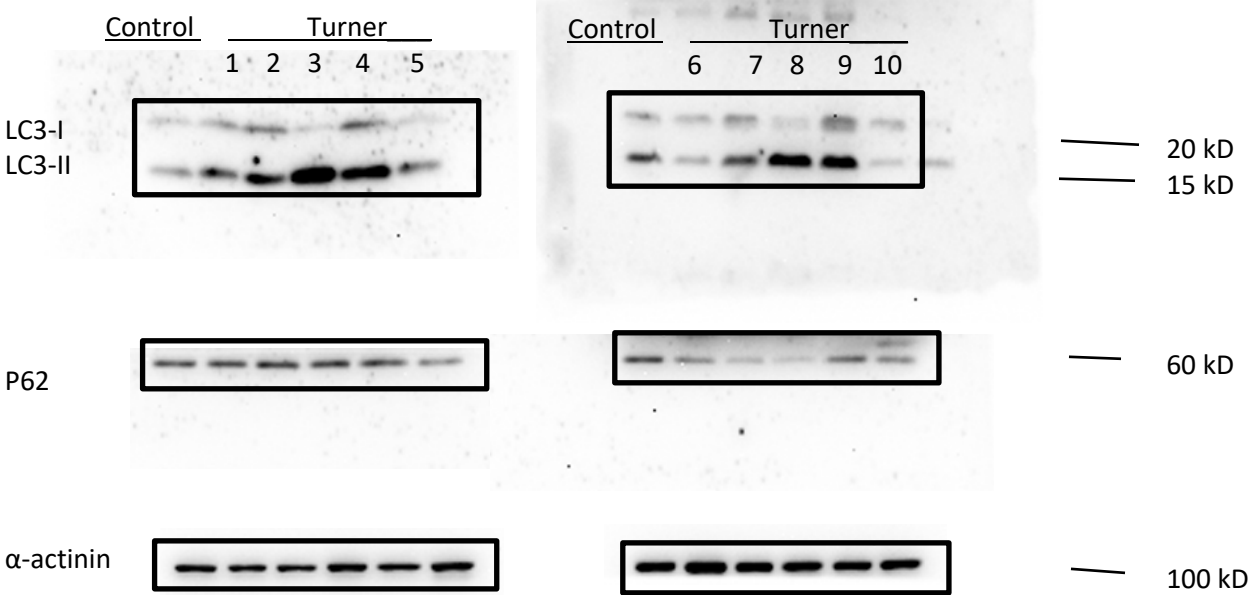

Figure 4j

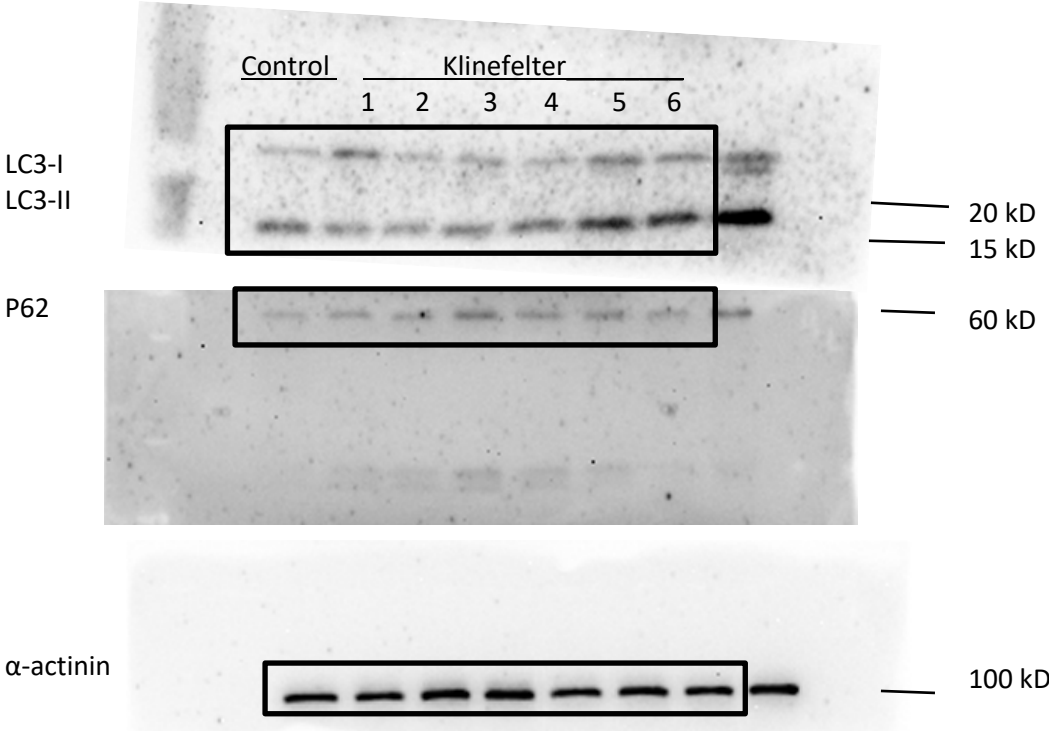

Figure 4m

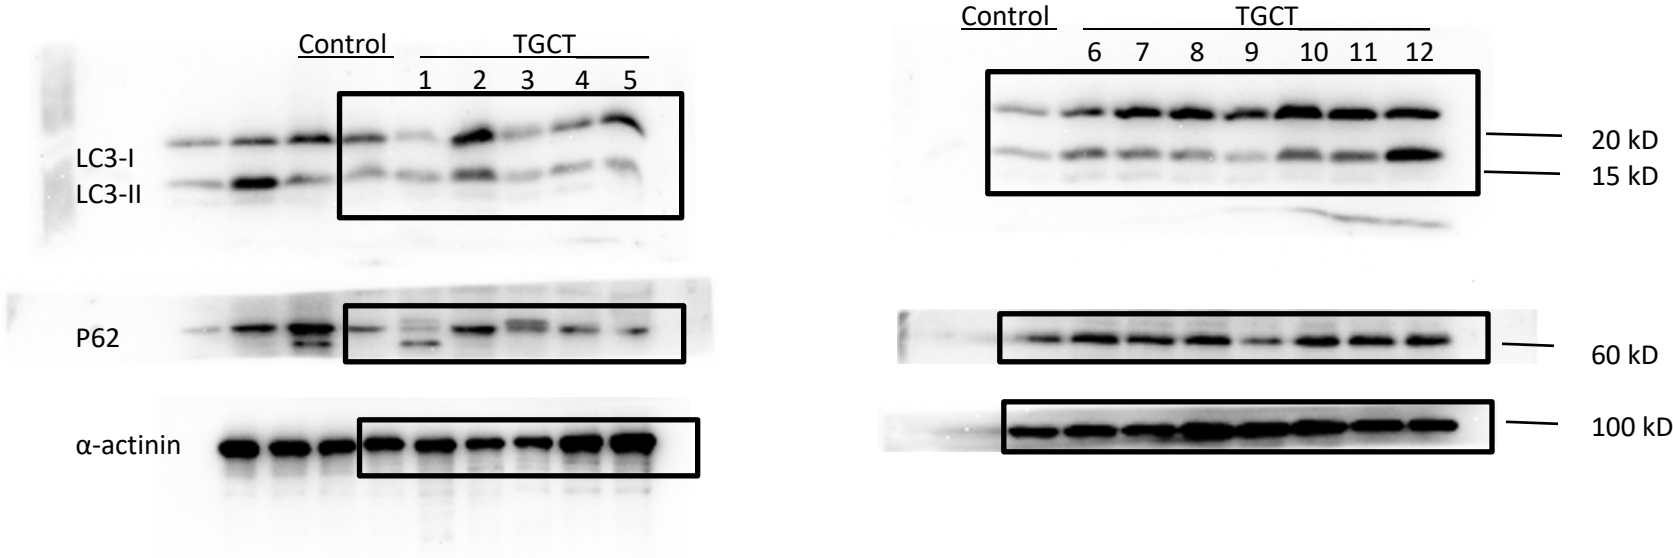

Figure 5a

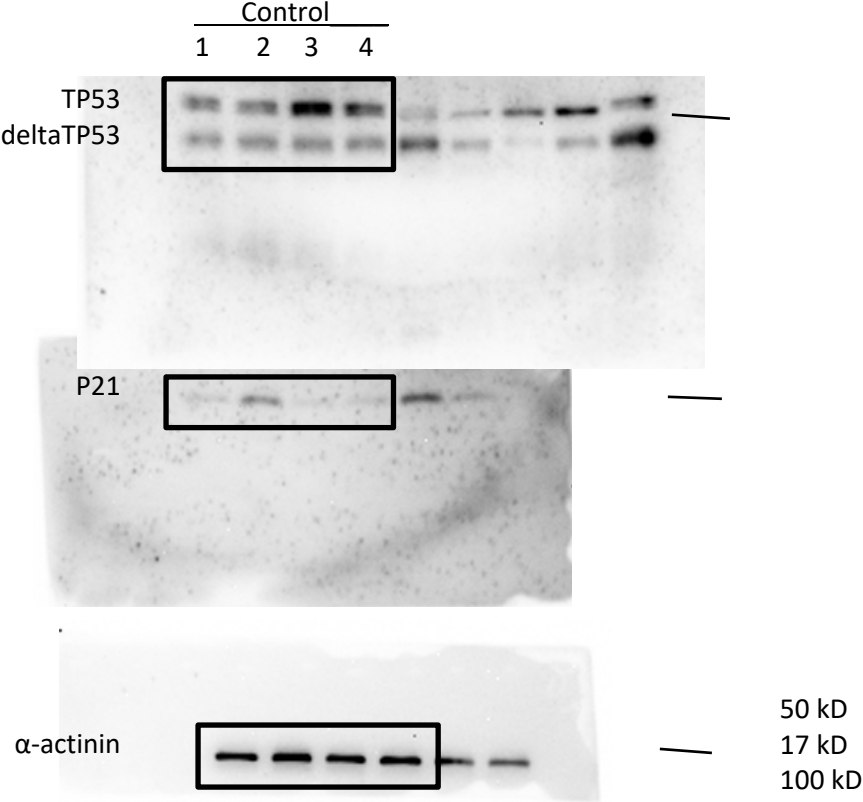



Figure 5c

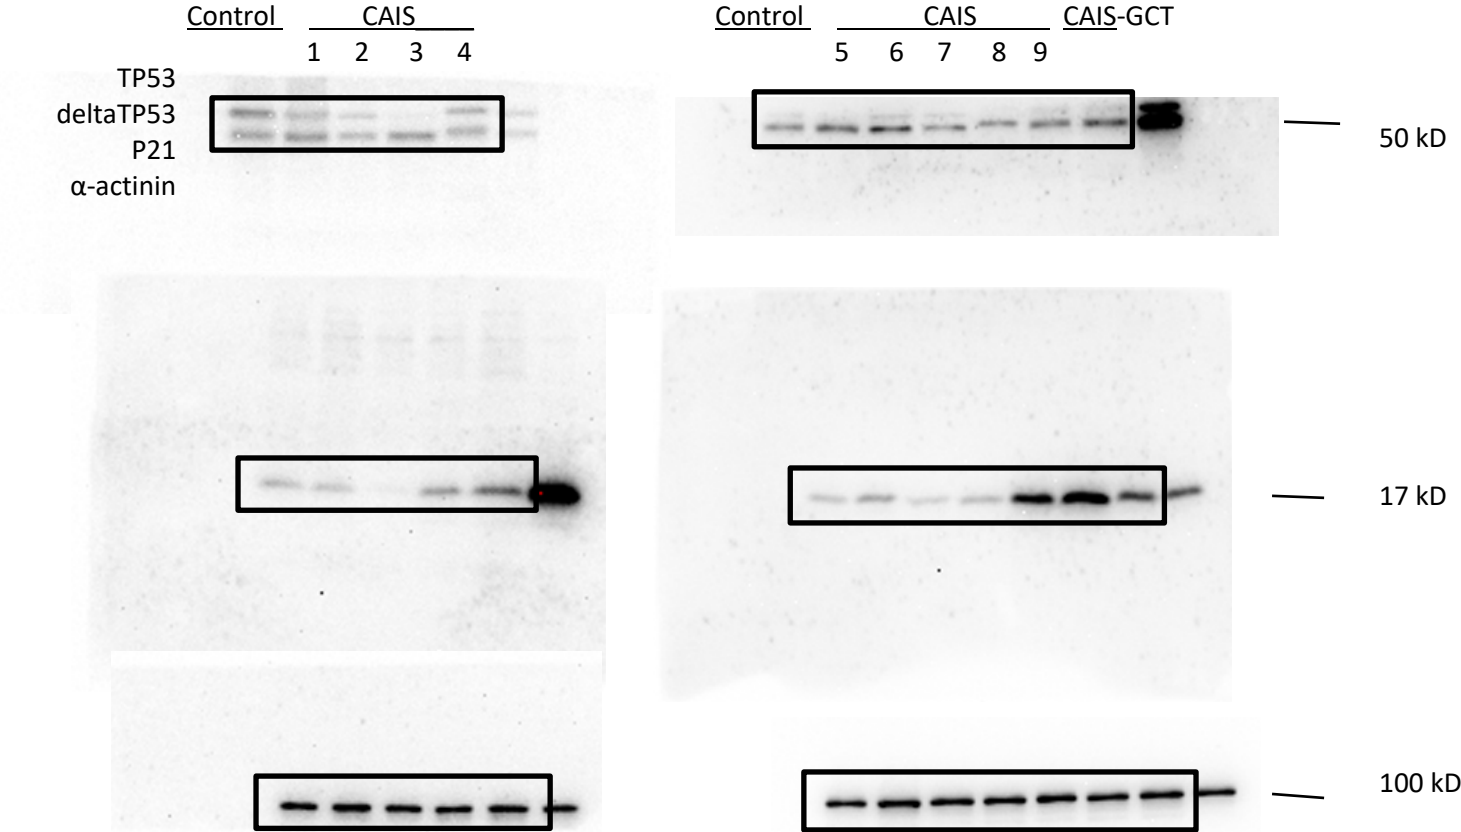







Figure 5g

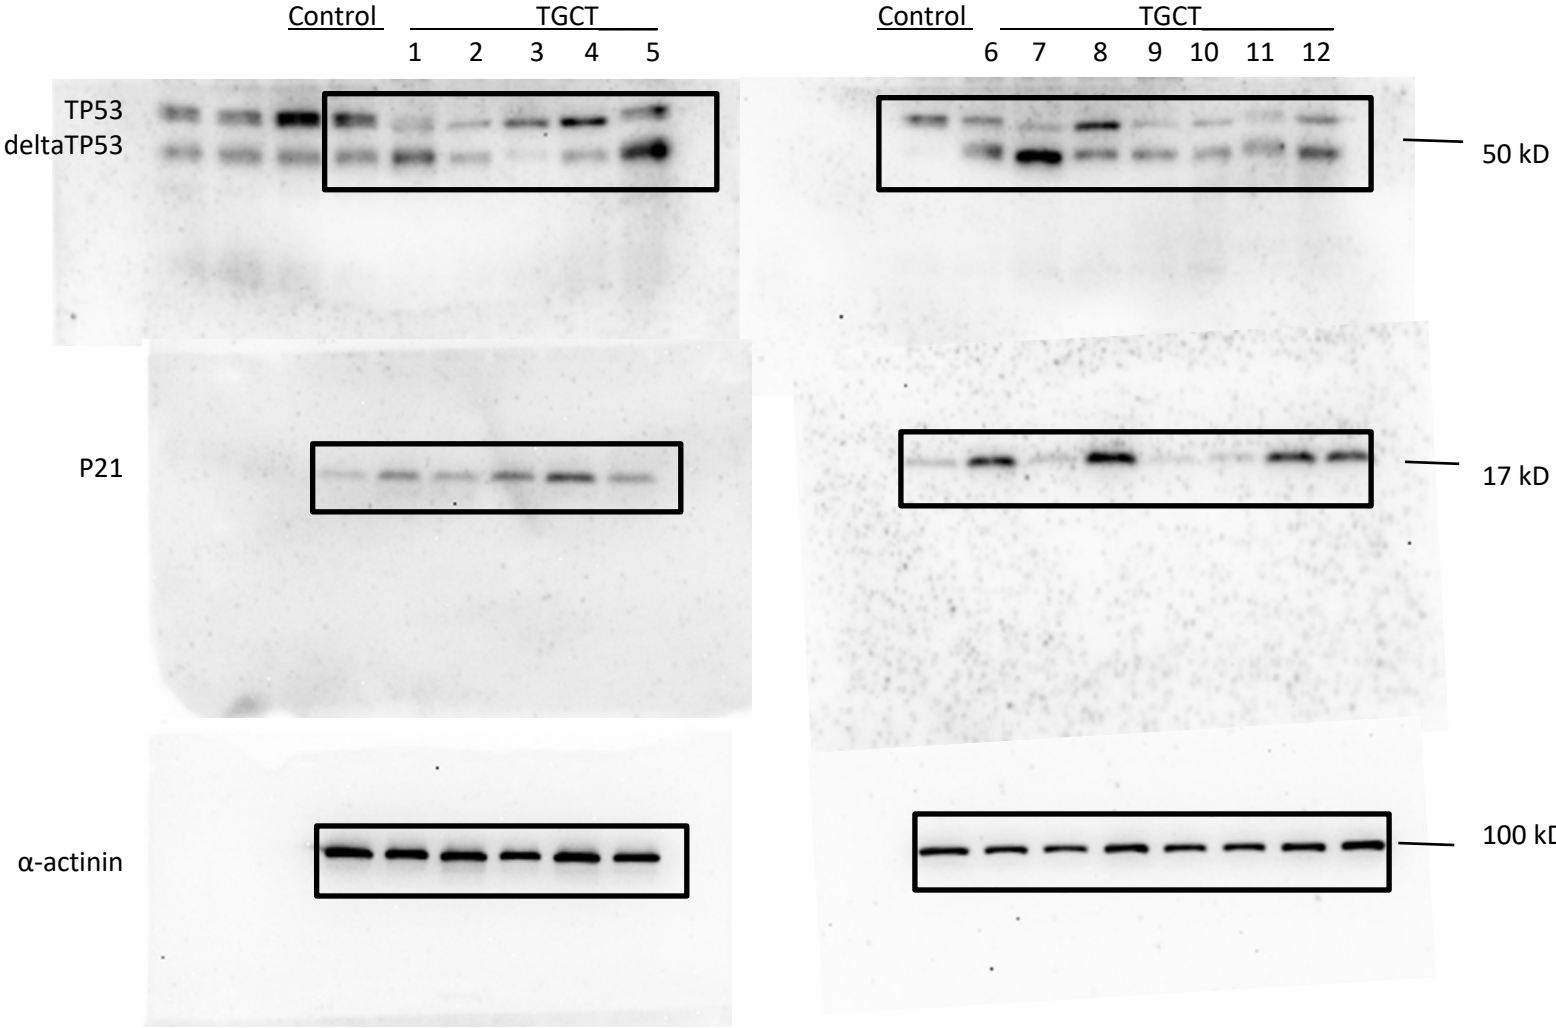

Figure 7a

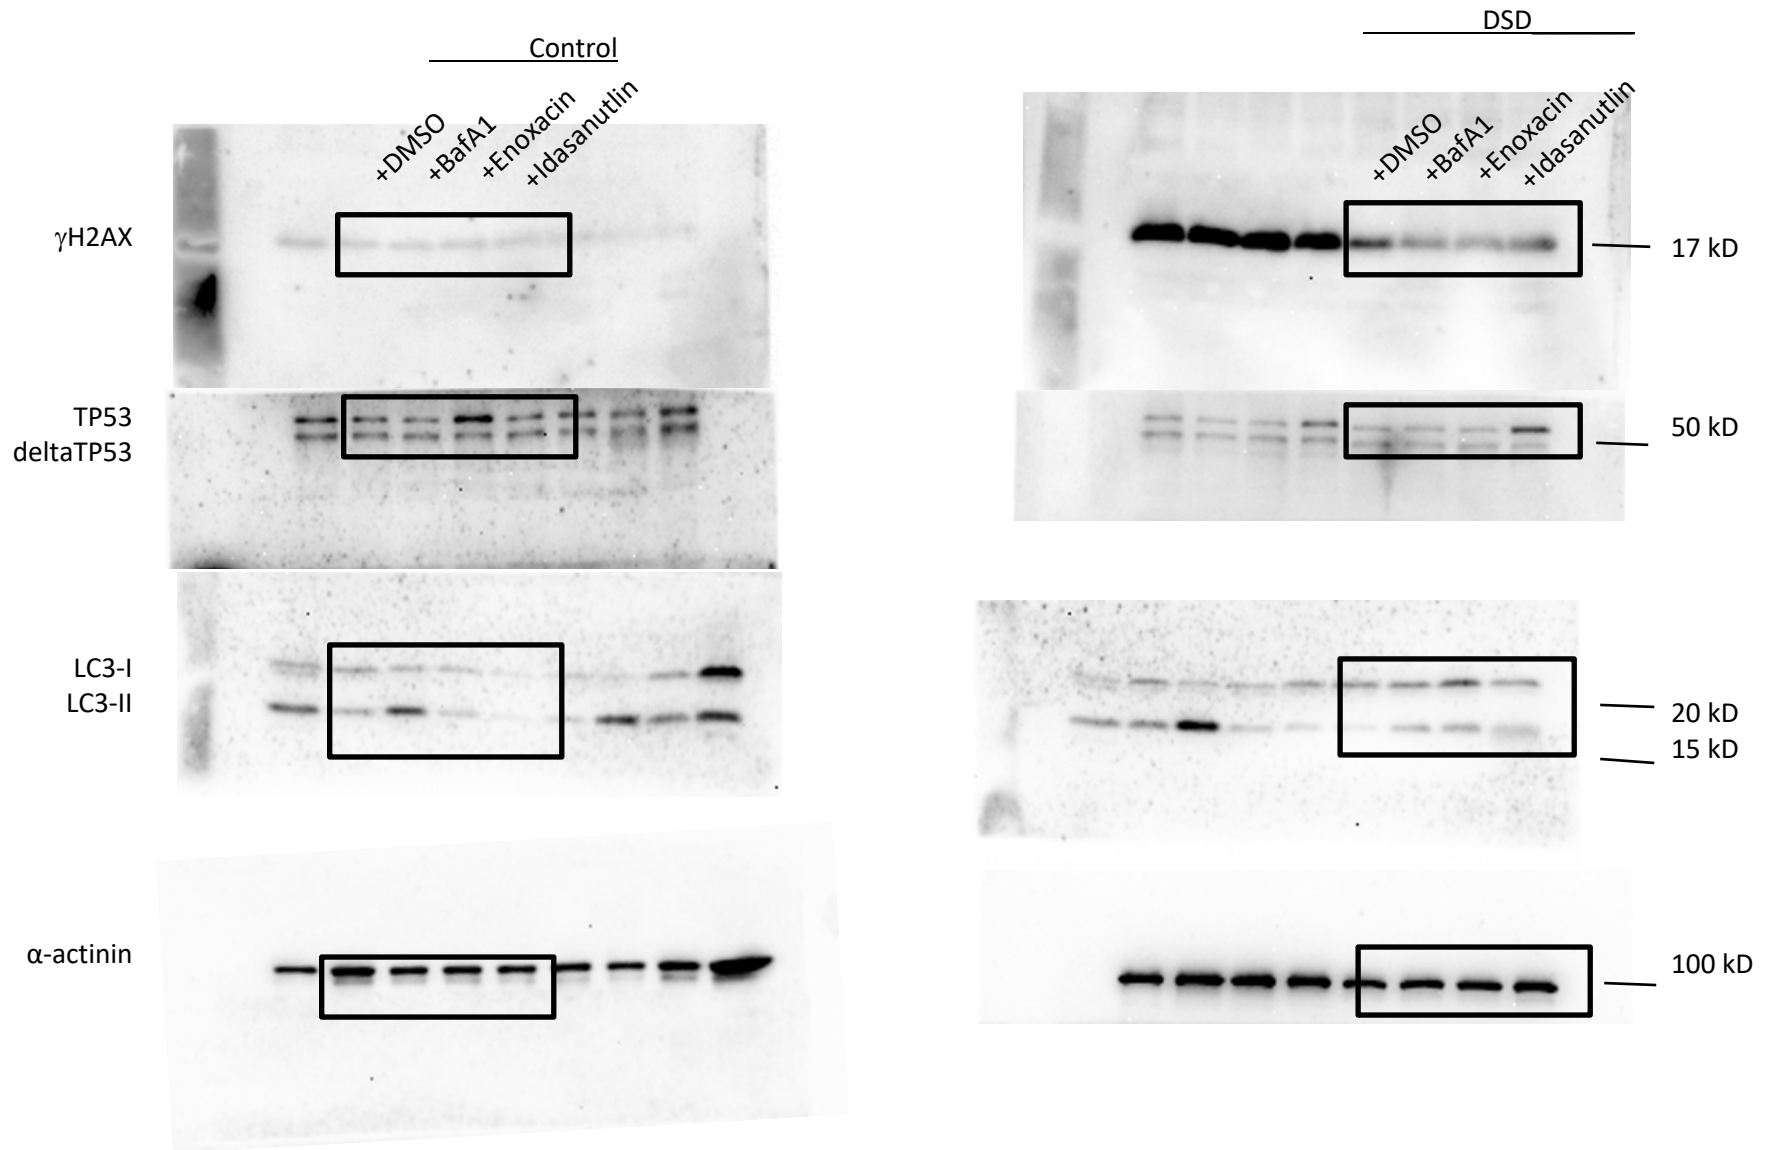

Figure 7e

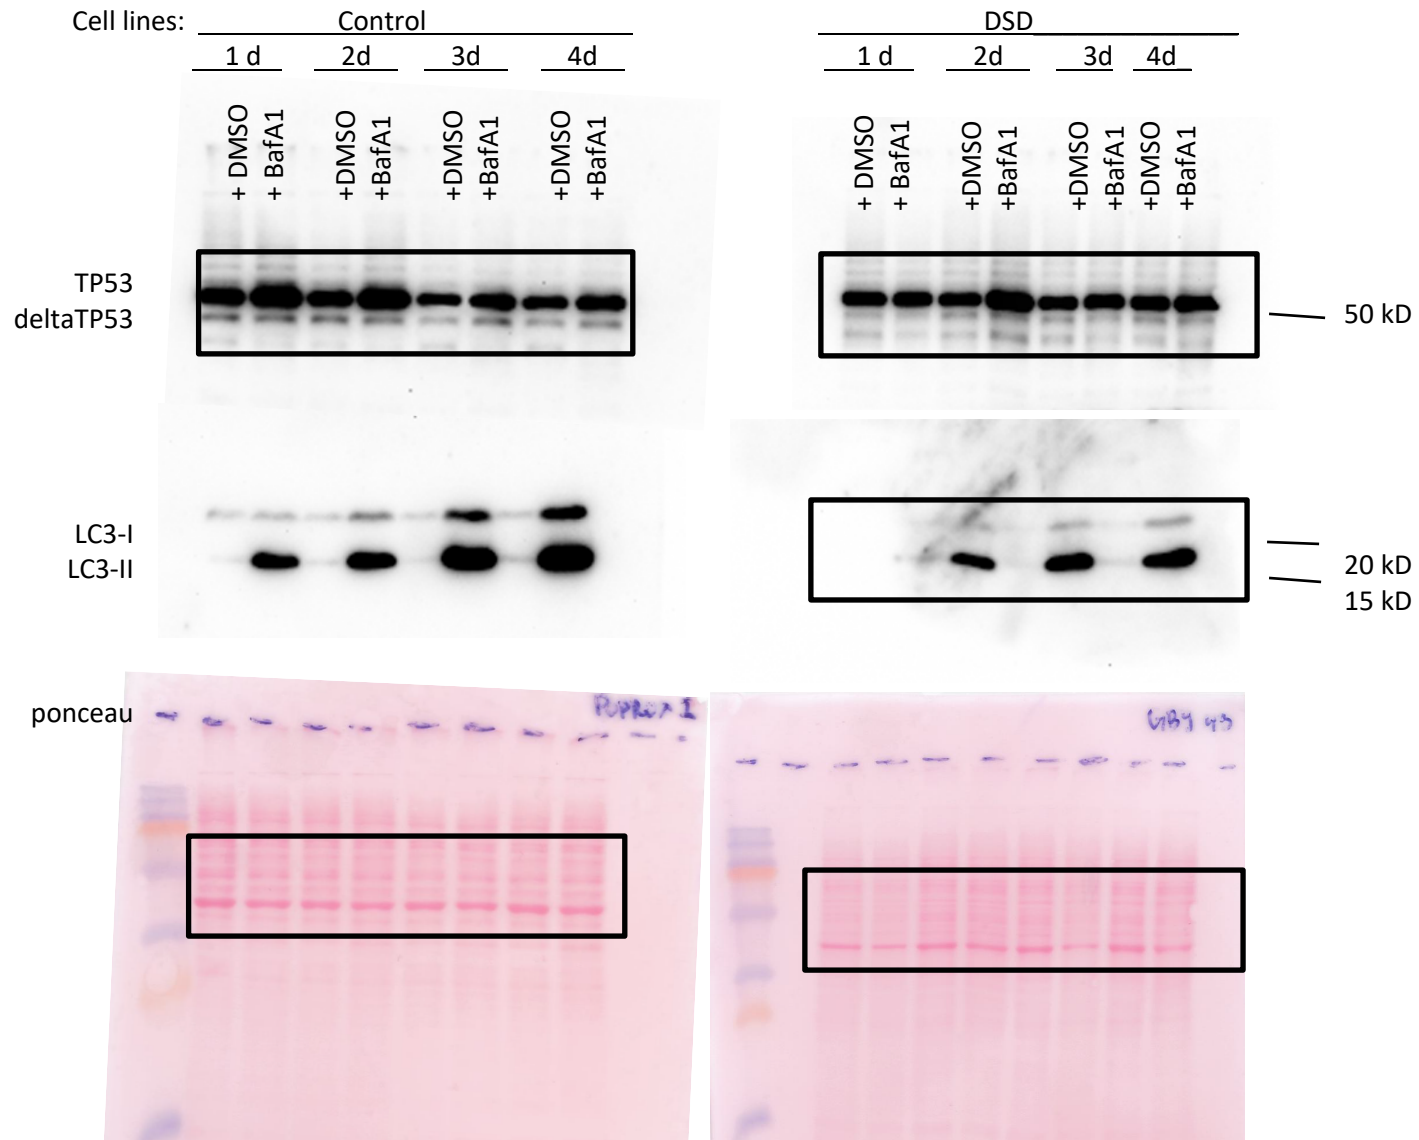

Extended data figure 3e

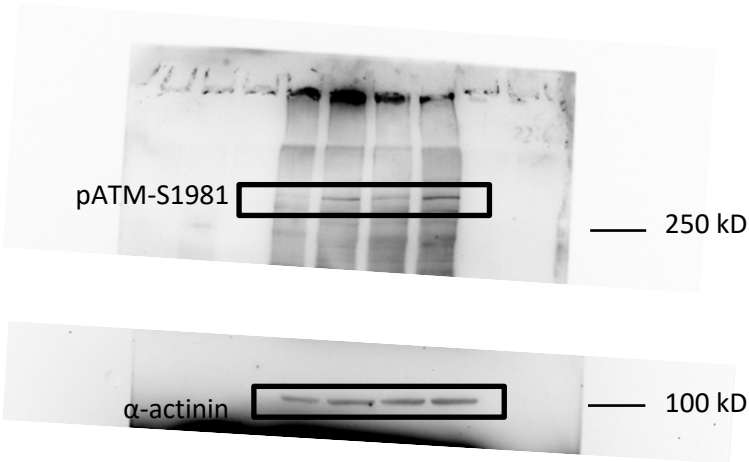

Supplement: 41420_2023_1470_MOESM15_ESM.pdf [file 41420_2023_1470_MOESM15_ESM.pdf]
