# Supplementary material for: Genomic instability in individuals with sex determination defects and germ cell cancer
Source: PubMed Central journal article supplement (PMC10202957; doi:10.1038/s41420-023-01470-6), 2023-05-23
Supplement: 41420_2023_1470_MOESM1_ESM.pdf [file 41420_2023_1470_MOESM1_ESM.pdf]

Extended data table 1.  
List of individuals with DSD.

|    | DSD groups | Age | Karyotype                | Phenotype | Malignant Tumor (gonadal biopsy) | Gonadal tissue histology                                                                                                                                   |
|----|------------|-----|--------------------------|-----------|----------------------------------|------------------------------------------------------------------------------------------------------------------------------------------------------------|
|    | Swyer-GCT  |     |                          |           |                                  |                                                                                                                                                            |
| 1  | 1          | 16  | 46, XY                   | Female    | Dysgerminoma                     | CD117+, PLAP+                                                                                                                                              |
| 2  | 2          | 18  | 46, XY                   | Female    | Seminoma/<br>Dysgerminoma        | PAS+                                                                                                                                                       |
| 3  | 3          | 17  | 46, XY<br>(SRY mutation) | Female    | Dysgerminoma                     | CD117+, D2-40+, OCT4+,<br>PLAP+, SALL4+                                                                                                                    |
| 4  | 4          | 32  | 46, XY                   | Female    | Dysgerminoma,<br>Gonadoblastoma  | AFP+, β-HCG+                                                                                                                                               |
| 5  | 5          | 6   | 46, XY                   | Female    | Dysgerminoma                     | KiA10+, AP +                                                                                                                                               |
|    | Swyer      |     |                          |           |                                  |                                                                                                                                                            |
| 6  | 1          | 24  | 46, XY                   | Female    | Not found                        |                                                                                                                                                            |
| 7  | 2          | 16  | 46, XY                   | Female    | Not found                        |                                                                                                                                                            |
| 8  | 3          | 12  | 46, XY                   | Female    | Not found                        |                                                                                                                                                            |
| 9  | 4          | 10  | 46, XY                   | Female    | Not found                        |                                                                                                                                                            |
| 10 | 5          | 18  | 46, XY                   | Female    | Not found                        |                                                                                                                                                            |
| 11 | 6          | 16  | 46, XY                   | Female    | Not found                        |                                                                                                                                                            |
| 12 | 7          | 17  | 46, XY                   | Female    | Not found                        |                                                                                                                                                            |
|    | CAIS       |     |                          |           |                                  |                                                                                                                                                            |
| 13 | 1          | 29  | 46, XY                   | Female    | Not found                        | Negative for AFP, OCT4,<br>SALL4, PLAP, S100,<br>CD117, beta-HCG                                                                                           |
| 14 | 2          | 45  | 46, XY                   | Female    | Not found                        | Negative for S100,<br>SALL4, AFP, C2-40,<br>OCT4, PLAP, beta-HCG                                                                                           |
| 15 | 3          | 14  | 46, XY                   | Female    | Not found                        |                                                                                                                                                            |
| 16 | 4          | 18  | 46, XY                   | Female    | Not found                        |                                                                                                                                                            |
| 17 | 5          | 9   | 46, XY                   | Female    | Not found                        |                                                                                                                                                            |
| 18 | 6          | 17  | 46, XY                   | Female    | Not found                        |                                                                                                                                                            |
| 19 | 7          | 17  | 46, XY                   | Female    | Not found                        |                                                                                                                                                            |
| 20 | 8          | 18  | 46, XY                   | Female    | Not found                        | hyperplastic Leydig cells                                                                                                                                  |
| 21 | 9          | 32  | 46, XY                   | Female    | Not found                        | Differentiated Sertoli-<br>Leydig cells tumor,<br>secondary Sertoli cells<br>hyperplasia, no germ<br>cells tumor, no<br>malignancy<br>OCT4+, TSPY+, DDX3Y+ |
|    | CAIS-GCT   |     |                          | Female    |                                  |                                                                                                                                                            |
| 22 | 1          |     | 46, XY                   | Female    | Dysgerminoma/<br>Gonadoblastoma  | D2-40, OCT4, SALL4                                                                                                                                         |
|    | Turner     |     |                          |           |                                  |                                                                                                                                                            |
| 23 | 1          | 14  | 45, X0                   | Female    | No biopsy                        |                                                                                                                                                            |
| 24 | 2          | 17  | 45, X0                   | Female    | No biopsy                        |                                                                                                                                                            |
| 25 | 3          | 10  | 45, X0                   | Female    | No biopsy                        |                                                                                                                                                            |
| 26 | 4          | 12  | 45, X0                   | Female    | No biopsy                        |                                                                                                                                                            |

|    |             |    |        |        |           |                                  |
|----|-------------|----|--------|--------|-----------|----------------------------------|
| 27 | 5           | 16 | 45, X0 | Female | No biopsy |                                  |
| 28 | 6           | 15 | 45, X0 | Female | No biopsy |                                  |
| 29 | 7           | 11 | 45, X0 | Female | No biopsy |                                  |
| 30 | 8           | 7  | 45, X0 | Female | No biopsy |                                  |
| 31 | 9           | 6  | 45, X0 | Female | No biopsy |                                  |
| 32 | 10          | 6  | 45, X0 | Female | No biopsy |                                  |
| 33 | 11          | 12 | 45, X0 | Female | No biopsy |                                  |
|    | Klinefelter |    |        |        |           |                                  |
| 34 | 1           | 34 | XXY    | Male   | Not found | pronounced fibrosis              |
| 35 | 2           | 28 | XXY    | Male   | Not found |                                  |
| 36 | 3           | 37 | XXY    | Male   | Not found |                                  |
| 37 | 4           | 32 | XXY    | Male   | Not found | pronounced fibrosis              |
| 38 | 5           | 37 | XXY    | Male   | Not found |                                  |
| 39 | 6           | 36 | XXY    | Male   | Not found | reactive Leydig cell hyperplasia |
