# Supplementary material for: Genomic instability in individuals with sex determination defects and germ cell cancer
Source: PubMed Central journal article supplement (PMC10202957; doi:10.1038/s41420-023-01470-6), 2023-05-23
Supplement: 41420_2023_1470_MOESM2_ESM.pdf [file 41420_2023_1470_MOESM2_ESM.pdf]

Extended data table 2.  
List of control individuals.

| Control group | Age | Karyotype | Phenotype |
|---------------|-----|-----------|-----------|
| 1             | 30  | XY        | Male      |
| 2             | 28  | XY        | Male      |
| 3             | 25  | XY        | Male      |
| 4             | 50  | XY        | Male      |
| 5             | 28  | XY        | Male      |
| 6             | 28  | XX        | Female    |
| 7             | 41  | XX        | Female    |
| 8             | 37  | XX        | Female    |
| 9             | 35  | XX        | Female    |
