# Supplementary material for: Genomic instability in individuals with sex determination defects and germ cell cancer
Source: PubMed Central journal article supplement (PMC10202957; doi:10.1038/s41420-023-01470-6), 2023-05-23
Supplement: 41420_2023_1470_MOESM3_ESM.pdf [file 41420_2023_1470_MOESM3_ESM.pdf]

Extended data table 3.  
List of TGCT-patients.

| TGCT | Age | Karyotype | Phenotype | Tumor                                                                                                    |
|------|-----|-----------|-----------|----------------------------------------------------------------------------------------------------------|
| 1    | 38  | 46, XY    | Male      | Seminoma                                                                                                 |
| 2    | 23  | 46, XY    | Male      | Seminoma;<br>Embryonal carcinoma;<br>Yolk sac tumor;<br>intratubular germ cell neoplasia<br>unclassified |
| 3    | 55  | 46, XY    | Male      | Seminoma                                                                                                 |
| 4    | 59  | 46, XY    | Male      | Embryonal carcinoma;<br>Teratoma                                                                         |
| 5    | 34  | 46, XY    | Male      | Seminoma                                                                                                 |
| 6    | 38  | 46, XY    | Male      | Seminoma,                                                                                                |
| 7    | 26  | 46, XY    | Male      | Seminoma;<br>Testicular intraepithelial<br>neoplasia                                                     |
| 8    | 56  | 46, XY    | Male      | Seminoma                                                                                                 |
| 9    | 45  | 46, XY    | Male      | Seminoma                                                                                                 |
| 10   | 40  | 46, XY    | Male      | Seminoma                                                                                                 |
| 11   | 46  | 46, XY    | Male      | Seminoma                                                                                                 |
| 12   | 44  | 46, XY    | Male      | Seminoma                                                                                                 |
| 13   | 32  | 46, XY    | Male      | Embryonic Carcinoma<br>Teratoma;<br>Chorionic Cancer;<br>Seminoma                                        |
| 14   | 25  | 46, XY    | Male      | Seminoma;<br>Embryonal Carcinoma;<br>Yolk sac Tumor;<br>Chorionic Carcinoma                              |
