# Supplementary material for: Genomic instability in individuals with sex determination defects and germ cell cancer
Source: PubMed Central journal article supplement (PMC10202957; doi:10.1038/s41420-023-01470-6), 2023-05-23
Supplement: 41420_2023_1470_MOESM5_ESM.pdf [file 41420_2023_1470_MOESM5_ESM.pdf]

Extended data table 5.

List of TaqMan assays.

| Target gene name             | Reference     |
|------------------------------|---------------|
| H2AFX                        | Hs00266783_s1 |
| LC3                          | Hs00261291_m1 |
| P62                          | Hs00177654_m1 |
| IFN $\beta$                  | Hs01077958_s1 |
| ISG15                        | Hs00192713_m1 |
| ISG56                        | Hs01675197_m1 |
| IL6                          | Hs00174131_m1 |
| LAMP2                        | Hs00903582_m1 |
| CTSB                         | Hs00947439_m1 |
| Endogenous control gene name |               |
| TBP                          | Hs00427620_m1 |
| HPRT                         | Hs99999909_m1 |
| GAPDH                        | Hs02758991_g1 |
| RPLPO                        | Hs99999902_m1 |
