# Supplementary material for: Genomic instability in individuals with sex determination defects and germ cell cancer
Source: PubMed Central journal article supplement (PMC10202957; doi:10.1038/s41420-023-01470-6), 2023-05-23
Supplement: 41420_2023_1470_MOESM8_ESM.pdf [file 41420_2023_1470_MOESM8_ESM.pdf]

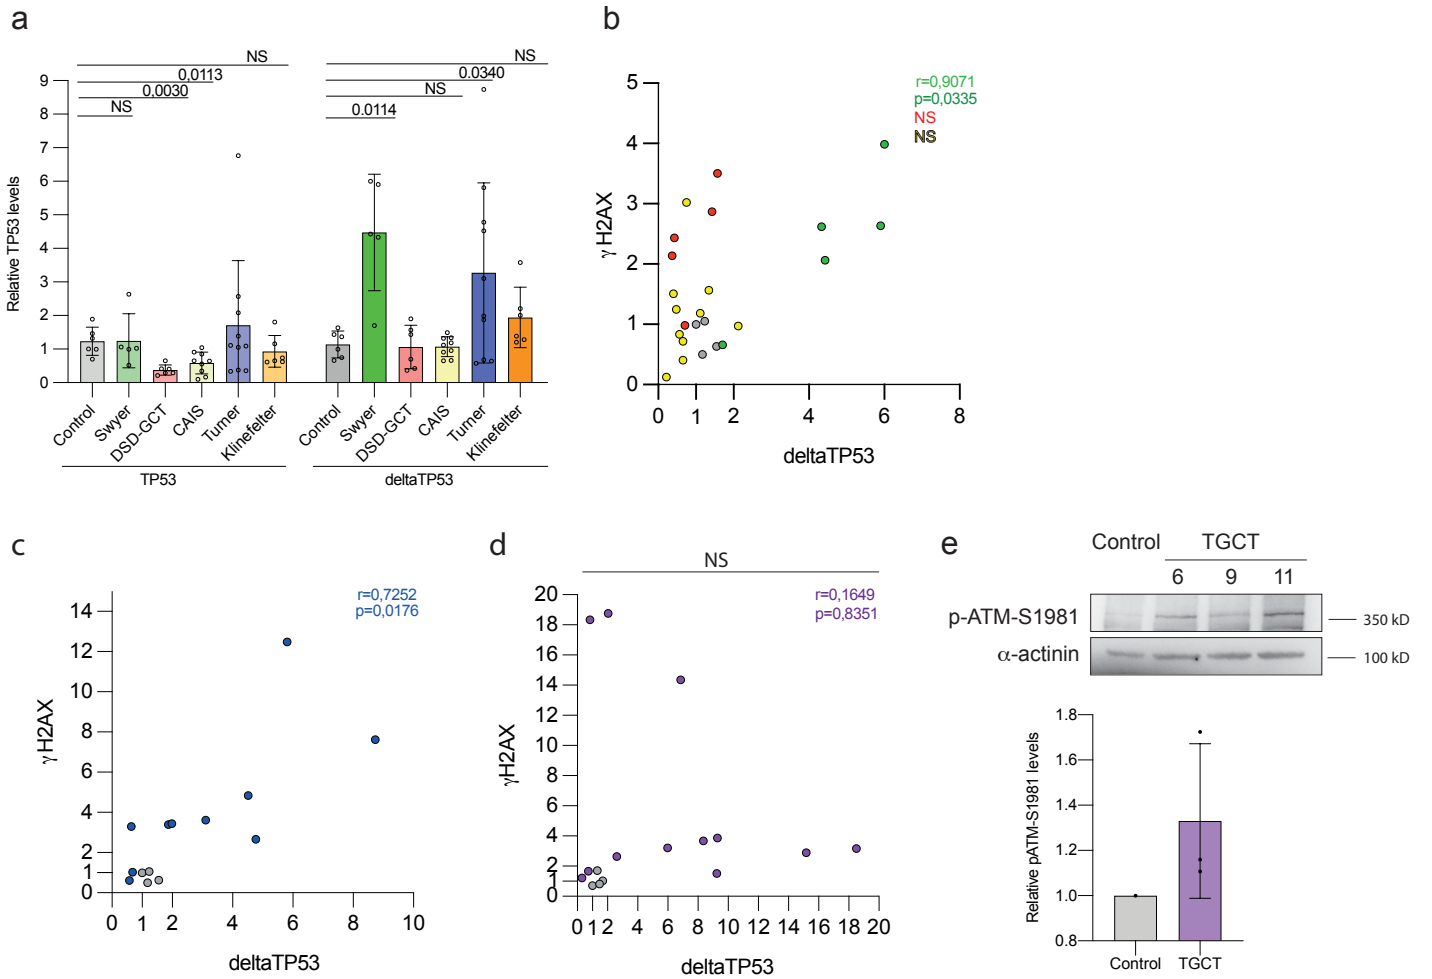

**Extended data figure 3. Associated TP53 expression with DNA damage levels.** (a) Quantification of TP53 protein levels relative to  $\alpha$ -actinin from immunoblottings (Figure 4 a-e). Pearson's correlation was performed for DSD-samples (b, c). CAIS (yellow), DSD-GCT (red) and control (grey) groups didn't show significant correlation (b) as well as TGCT-group (d). Swyer (green) and Turner (blue)-samples showed significant correlation between  $\gamma$ H2AX and TP53. Pearson's correlation coefficients and p values from unpaired t test are indicated. e) Expression of the phosphorylated form in ATM in leukocytes from the peripheral blood. Immunoblotting for p-ATM on serine residue S1981, and  $\alpha$ -actinin was used as the loading control. f) Quantification of the relative levels of p-ATM-S1981 from immunoblot (e).
