# Supplementary material for: Genomic instability in individuals with sex determination defects and germ cell cancer
Source: PubMed Central journal article supplement (PMC10202957; doi:10.1038/s41420-023-01470-6), 2023-05-23
Supplement: 41420_2023_1470_MOESM9_ESM.pdf [file 41420_2023_1470_MOESM9_ESM.pdf]

**a**

Exon 10

```

Swyer-GCT-1  ---CGGCGGGTTATCCTTCTTCCCCCCTGTTGCTGCAGATCGTGGGCGTGAGCGCTTC  57
Swyer-GCT-4  --AAGCCGGTATATCCTTCTTCCCCCCTGTTGCTGCAGATCGTGGGCGTGAGCGCTTC  58
TP53-control  -----GCAGATCCGTGGGCGTGAGCGCTTC  25
Swyer-1      GGTGGCAGGTTATCTTCTGTTCCCCCCTGTTGCTGCAGATCGTGGGCGTGAGCGCTTC  60
Swyer-2      --TGCAGCCGGTTTCTTCTGTTCCCCCCTGTTGCTGCAGATCGTGGGCGTGAGCGCTTC  58
                *****

Swyer-GCT-1  GAGATGTTCCGAGAGCTGAATGAGGCCCTTGAAGCTCAAGGATGCCCAGGCTGGGAAGGAG  117
Swyer-GCT-4  GAGATGTTCCGAGAGCTGAATGAGGCCCTTGAAGCTCAAGGATGCCCAGGCTGGGAAGGAG  118
TP53-control  GAGATGTTCCGAGAGCTGAATGAGGCCCTTGAAGCTCAAGGATGCCCAGGCTGGGAAGGAG  85
Swyer-1      GAGATGTTCCGAGAGCTGAATGAGGCCCTTGAAGCTCAAGGATGCCCAGGCTGGGAAGGAG  120
Swyer-2      GAGATGTTCCGAGAGCTGAATGAGGCCCTTGAAGCTCAAGGATGCCCAGGCTGGGAAGGAG  118
                *****

Swyer-GCT-1  CCAGGGGGGAGCAGGGCTCACTCCAGGTGAGTGACCTCAGCCCTTCCCTGGCCCTACTCC  177
Swyer-GCT-4  CCAGGGGGGAGCAGGGCTCACTCCAGGTGAGTGACCTCAGCCCTTCCCTGGCCCTACTCC  178
TP53-control  CCAGGGGGGAGCAGGGCTCACTCCAGGT-----  113
Swyer-1      CCAGGGGGGAGCAGGGCTCACTCCAGGTGAGTGACCTCAGCCCTTCCCTGGCCCTACTCC  180
Swyer-2      CCAGGGGGGAGCAGGGCTCACTCCAGGTGAGTGACCTCAGCCCTTCCCTGGCCCTACTCC  178
                *****

```

**b**

Exon 11

```

TP53-control  -----AGCCACCTGAAGTCCAAAAAGGGTCACTACCTCCCG  38
Swyer-GCT-1  ----GCTCTCTCCTCCTTTGCTCCTCAGCCACTGAAGCCAAAAAGGGCAGCTACCTCCCG  56
Swyer-GCT-4  GTCCTCTCCCTCCTTCTTGCTCCTCAGCCCTCCTGAAGCCAAAAAGGGCAGCTACCTCCCG  60
                * * ** * *****

TP53-control  CCATAAAAAACTCATGTTCAAGACAGAAGGGCCTGACTCAGACTGACATTCTCCACTTCT  98
Swyer-GCT-1  CCATAAAAAACTCATGTTCAAGACAGAAGGGCCTGACTCAGACTGACATTCTCCACTTCT  116
Swyer-GCT-4  CCATAAAAAACTCATGTTCAAGACAGAAGGGCCTGACTCAGACTGACATTCTCCACTTCT  120
                *****

TP53-control  TGTTCCTCCACTGACAGCCTCCACCCCATCTCTCCCTCCCTGCCATTTTGGGTTTGG  158
Swyer-GCT-1  TGTTCCTCCACTGACAGCCTCCACCCCATCTCTCCCTCCCTGCCATTTTGGGTTTGG  176
Swyer-GCT-4  TGTTCCTCCACTGACAGCCTCCACCCCATCTCTCCCTCCCTGCCATTTTGGGTTTGG  180
                *****

TP53-control  GTCTTTGAACCTTGTCTTGCAATAGGTGTGCGTCAGAAGCACCAGGACTTCCATTGCT  218
Swyer-GCT-1  GTCTTTGAACCGTTGCAATGCAATGGGGTGTGCGTCAA-----  216
Swyer-GCT-4  GTCTTTGAACCGGTTGCATATGCAATGGTGTGCGTCAA-----  220
                *****

```

**Extended Data Figure 4. DNA sequence alignment.** Genomic DNA of two Swyer-GCT samples were sequenced on the regions encoding exon 10 (a) and exon 11 (b) of gene TP53.
