# Supplementary material for: Genomic instability in individuals with sex determination defects and germ cell cancer
Source: PubMed Central journal article supplement (PMC10202957; doi:10.1038/s41420-023-01470-6), 2023-05-23
Supplement: 41420_2023_1470_MOESM14_ESM.pdf [file 41420_2023_1470_MOESM14_ESM.pdf]

**Supplementary dataset 5.**  
**Exon 2 TP53 alignment to reference sequence.**

```

Swyer-2
TP53-control
Query   23   CCGTCCGGGCTA-TGCCAGTGGGAGGAGCCGCAGT-AGATCCCTAGCGTCGAGCCCCCTC   80
      || ||||| | |||| | ||||| | ||||| | ||||| | ||||| | ||||| |
Sbjct   14   CCTTCCGGGTCACTGCCA-T-GGAGGAGCCGCAGTCAGAT-CCTAGCGTCGAGCCCCCTC   70

Query   81   TGAGTCAGGAAACATTTTCAGACCTATGGAAACTGTGAGTGGATCCATTGGAAGGGCAGG   140
      ||||| | ||||| | ||||| | ||||| | ||||| | ||||| | ||||| | ||||| |
Sbjct   71   TGAGTCAGGAAACATTTTCAGACCTATGGAAACTGTGAGTGGATCCATTGGAAGGGCAGG   130

Query   141  CCCACCACCCCGACCCCAACCCAGCCCCCTAGCAGAGACCTGTGGGAAGCGAAAATTC   200
      ||||| | ||||| | ||||| | ||||| | ||||| | ||||| | ||||| | ||||| |
Sbjct   131  CCCACCACCCCGACCCCAACCCAGCCCCCTAGCAGAGACCTGTGGGAAGCGAAAATTC   189

Query   201  CATGGGACTGACTTTCTGCTCTTGCTTTTCAGACTTCCTGAAAACAACGTTCTGGT   256
      ||||| | ||||| | ||||| | ||||| | ||||| | ||||| | ||||| | ||||| |
Sbjct   190  CATGGGACTGACTTTCTGCTCTTGCTTTTCAGACTTCCTGAAAACAACGTTCTGGT   245

Swyer-3
TP53-control
Query   19   CCATCCGGG-CCTTGCCATGGAGGAGCCGCAG-CAGAT-CTAGCG-CGAGCCCCCTCTGA   74
      || ||||| | ||||| | ||||| | ||||| | ||||| | ||||| | ||||| |
Sbjct   14   CCTTCCGGGTCACTGCCATGGAGGAGCCGCAGTCAGATCCTAGCGTCGAGCCCCCTCTGA   73

Query   75   G-CAGGAAACATTTTCAGACCTATGGAAACTGTGAGTGGATCCATTGGAAGGGCAGGCC   133
      | ||||| | ||||| | ||||| | ||||| | ||||| | ||||| | ||||| | ||||| |
Sbjct   74   GTCAGGAAACATTTTCAGACCTATGGAAACTGTGAGTGGATCCATTGGAAGGGCAGGCC   133

Query   134  ACCACCCCGACCCCAACCCAGCCCCCTAGCAGAGACCTGTGGGAAGCGAAAATTCAT   193
      ||||| | ||||| | ||||| | ||||| | ||||| | ||||| | ||||| | ||||| |
Sbjct   134  ACCACCCCGACCCCAACCCAGCCCCCTAGCAGAGACCTGTGGGAAGCG-AAAATTCAT   192

Query   194  GGGACTGACTTTCTGCTCTTGCTTTTCAGACTTCCTGAAAACAACGTTCTGGT   246
      ||||| | ||||| | ||||| | ||||| | ||||| | ||||| | ||||| | ||||| |
Sbjct   193  GGGACTGACTTTCTGCTCTTGCTTTTCAGACTTCCTGAAAACAACGTTCTGGT   245

Swyer-4
TP53-control
Query   23   TCCGGG-CA-TGCCATGGAGGAGCCGCAGT-AGAT-CTAGCGTCGAGCCCCCTCTGAGTC   78
      ||||| || ||||| | ||||| | ||||| | ||||| | ||||| | ||||| | ||||| |
Sbjct   17   TCCGGGTCACCTGCCATGGAGGAGCCGCAGTCAGATCCTAGCGTCGAGCCCCCTCTGAGTC   76

Query   79   AGGAAACATTTTCAGACCTATGGAAACTGTGAGTGGATCCATTGGAAGGGCAGGCCACC   138
      ||||| | ||||| | ||||| | ||||| | ||||| | ||||| | ||||| | ||||| |
Sbjct   77   AGGAAACATTTTCAGACCTATGGAAACTGTGAGTGGATCCATTGGAAGGGCAGGCCACC   136

```

Query 139 ACCCCGACCCCAACCCAGCCCCCTAGCAGAGACCTGTGGGAAGCGAAAATTCATGGGA 198  
|||||

Sbjct 137 ACCCCACCCCAACCCAGCCCCCTAGCAGAGACCTGTGGGAAGCGAAAATTCATGGGA 196

Query 199 CTGACTTCTGCTCTTGTCTTTCAGACTTCCTGAAAACAACGTTCTGGT 247  
|||||

Sbjct 197 CTGACTTCTGCTCTTGTCTTTCAGACTTCCTGAAAACAACGTTCTGGT 245

Swyer-5-ex2  
TP53-control

Query 33 AGCAGCCCGCTGCCT-CCGGG-CACTGCCAT-GA-GAGCCGAGTCAG-TCCTAGCGTC 87  
|||||

Sbjct 1 AGCAGCCAGACTGCCTTCCGGGTCACTGCCATGGAGAGCCGAGTCAGATCCTAGCGTC 60

Query 88 GTGCCCCCTCTGAGTCAGGAAACATTTTCAGACCTATGGAA-CTGT-AGT-GATCCATTG 144  
|

Sbjct 61 GAGCCCCCTCTGAGTCAGGAAACATTTTCAGACCTATGGAACTGTGAGTGGATCCATTG 120

Query 145 GAAGGG-A-GCCACCCACCCCAACCCAGCCCC-TAG-A-AG-CCTGTGG-AAG 197  
|||||

Sbjct 121 GAAGGGCAGGCCACCACCCCAACCCAGCCCCCTAGCAGAGACCTGTGGGAAG 180

Query 198 -GAAA-TTCCATGGG-CTG-CTTCTGCTCTTGTCTTTCAG-CTTCCT-AAAACAACGTT 251  
||||

Sbjct 181 CGAAAATTCATGGGACTGACTTCTGCTCTTGTCTTTCAGACTTCCTGAAAACAACGTT 240

Query 252 CTGG 255  
||||

Sbjct 241 CTGG 244

Swyer-7-ex2  
TP53-control

Query 1 AGCAGCCAGACTGCCTTCCGGGTCACTGCCATGGAGAGCCGAGTCAGATCCTAGCGTC 60  
|||||

Sbjct 1 AGCAGCCAGACTGCCTTCCGGGTCACTGCCATGGAGAGCCGAGTCAGATCCTAGCGTC 60

Query 61 GAGCCCCCTCTGAGTCAGGAAACATTTTCAGACCTATGGAACTGTGAGTGGATCCATTG 120  
|||||

Sbjct 61 GAGCCCCCTCTGAGTCAGGAAACATTTTCAGACCTATGGAACTGTGAGTGGATCCATTG 120

Query 121 GAAGGGCAGGCCACCACCCCAACCCAGCCCCCTAGCAGAGACCTGTGGGAAG 180  
|||||

Sbjct 121 GAAGGGCAGGCCACCACCCCAACCCAGCCCCCTAGCAGAGACCTGTGGGAAG 180

Query 181 CGAAAATTCATGGGACTG-CTTCTGCTCTTG-CTTTCAG-CTTCCTGAAAACAACGTT 237  
|||||

Sbjct 181 CGAAAATTCATGGGACTGACTTCTGCTCTTGTCTTTCAGACTTCCTGAAAACAACGTT 240

```

Query 238 CTGG 241
      ||||
Sbjct 241 CTGG 244

Swyer-1-ex2      TATTATATGCCGATTCCCATTTTCCTCTCCAGCAGCCCGCCTGCTTCC--GGTCCCTCCC      58
TP53-control     -----AGCAGCCAGACTGCCTTCCGGGTCACCTGCC      30
                  ***** * * * * * * * * * * * * * * *

Swyer-1-ex2      ATGAC-----GACCGAGTCTGTCTTAGGTGCCACCCTCTAGTCAGAAACACTTTC      109
TP53-control     ATGGAGGAGCCGAGTCAGATCCTAGCGTCG-AGCCCCCTCTGAGTCAGGAAACATTTTC      89
                  ***          * * * * * * * * * * * * * * *

Swyer-1-ex2      ACACCATGGAAGTGTAGGGG---GGCCTTGGAAGGGAGGCGCCACCCCGCCCTAA      164
TP53-control     AGACCTATGGAAGTGTAGTGGATCCATTGGAAGGGCAGGCCACCACCCCGCCCAA      149
                  * * * * * * * * * * * * * * * * * * * * * * * *

Swyer-1-ex2      CGCCCCCCTTAAGA---GGATCTGCGGAAGCGAAATTCAC-----TGACTGCTTTCT      214
TP53-control     CCCCAGCCCCCTAGCAGAGACCTGTGGGAAGCGAAAATTCATGGGACTGACTTTCTGCT      209
                  * * * * * * * * * * * * * * * * * * * * * * * *

Swyer-1-ex2      GTCCTGATGCAGCTTCTTAAACACGCGGGACTGCCTGCGGTGCCTGAGCCTTTCGCGGT      274
TP53-control     CTTGTCTTTTCAGACTTCTTAAACACGTTCTGGT-----      245
                  * * * * * * * * * * * * * * *

Swyer6-ex2       TTCTATGCTGATCCCCCTTTTCCTCTTCAGAGCAGCTG-CTTCCGGGCACTGCCATGAGA      59
TP53-control     -----AGCAGCCAGACTGCCTTCCGGGTCACCTGCCATGGAGGAGCCGAGTCA--      48
                  * * * * * * * * * * * * * * * * * * * * *

Swyer6-ex2       GCCGAGTCAGTCCTAGCGCGGCCCTCTAGTCAGGAACATTTTCAGCCATGGAAGTGA-      118
TP53-control     ---GATCCTAGCGTCGAGCCCCCTCTGAGTCAGGAACATTTTCAGACCTATGGAAGTGA      105
                  ** * * * * * * * * * * * * * * * * * * * * *

Swyer6-ex2       ---GTGGTCCATTGAAAGG--GAGCCACCACCCCAACCCCAACCCAGCCC-----C      166
TP53-control     TGAGTGGATCCATTGGAAGGGCAGGCCACCACCCCAACCCCAACCCAGCCCCCTAGCA      165
                  * * * * * * * * * * * * * * * * * * * * * * * *

Swyer6-ex2       TAGAAGCCTGTGGAAGCGAAATTCATGGGCTGCTT--TCTGCTCTTTC---TTTCAGCT      221
TP53-control     GAGACCTGTGGGAAGCGAAATTCATGGGACTGACTTTCTGCTCTTGTCTTTTCAGACTT      225
                  *** ** * * * * * * * * * * * * * * * * * * * *

Swyer6-ex2       TCCTAAAACAACGCTCTGGAAGGCAGGGAGGGCTGGGGCTGGCGAAAGTATCGAGATAT      280
TP53-control     CCTGAAAACAACGTTCTGGT-----      245
                  * * * * * * * * * * *

DSD-GCT1-ex2
TP53-control

Query 22 TCCGGG-CCGTGCCATGGGAGGAGCCGAGT-AGATCTTAGCGT-GAGCCCCCTCTGAGT 78
      ||||| | ||||| ||||| ||||| ||||| ||||| ||||| ||||| ||||| |||||
Sbjct 17 TCCGGGTCACCTGCCAT-GGAGGAGCCGAGTCAGATCCTAGCGTCGAGCCCCCTCTGAGT 75

Query 79 CAGGAAACATTTTCAGACCTATGGAAGTGTGAGTGGATCCATTGGAAGGGCAGGccccac 138
      ||||| ||||| ||||| ||||| ||||| ||||| ||||| ||||| ||||| ||||| |||||
Sbjct 76 CAGGAAACATTTTCAGACCTATGGAAGTGTGAGTGGATCCATTGGAAGGGCAGGCCCCAC 135

Query 139 CACCCCGACCCCAACCCAGCCCCCTAGCAGAGACCTGTGGGAAGCGAAAATTCATGG 198
      ||||| ||||| ||||| ||||| ||||| ||||| ||||| ||||| ||||| |||||
Sbjct 136 CACCCCG-ACCCCAACCCAGCCCCCTAGCAGAGACCTGTGGGAAGCGAAAATTCATGG 194

Query 199 GACTGACTTTCTGCTCTTGTCTTTTCAGACTTCTGAAAACAACGTTCTGGT 249
      ||||| ||||| ||||| ||||| ||||| ||||| ||||| ||||| ||||| |||||
Sbjct 195 GACTGACTTTCTGCTCTTGTCTTTTCAGACTTCTGAAAACAACGTTCTGGT 245

```

DSD-GCT2-ex2  
TP53-control

Query 20 TCCGGG-CA-T-CCATGGAGGAGCCGCAG-CAGA-CCTAGCG-CGAGCCCC-CTGAG-C 71  
||||| | | |||||||||||||||| ||| ||||| ||||||| ||||| |  
Sbjct 17 TCCGGGTCACTGCCATGGAGGAGCCGCAGTCAGATCCTAGCGTCGAGCCCCCTCTGAGTC 76  
  
Query 72 AGGAAACA-TTTCAGACCTATGGAACTGTGAGTGGAT-CATTGGAAGGGCAGGCCACC 129  
||||||| ||||||||||||||||||||| |||||||||||||||||||||  
Sbjct 77 AGGAAACATTTTCAGACCTATGGAACTGTGAGTGGATCCATTGGAAGGGCAGGCCACC 136  
  
Query 130 ACCCCGACCCCAACCCAGCCCCCTAGCAGAGACCTGTGGGAAAGCGAAAATT-CATGGGA 188  
||||| ||||||||||||||||||||||| ||||||||||||||||||||| |||||||  
Sbjct 137 ACCCCGACCCCAACCCAGCCCCCTAGCAGAGACCTGTGGGAAAGCGAAAATTCATGGGA 196  
  
Query 189 CTGACTTCTGCTCTTGCTTTTCAGACTTCTGAAAACAACGTTCTGGT 237  
||||||||||||||||||||||||||||| |||||||||||||||||||||  
Sbjct 197 CTGACTTCTGCTCTTGCTTTTCAGACTTCTGAAAACAACGTTCTGGT 245

DSD-GCT3-ex2  
TP53-control

Query 19 GCC-TCCGGG-C-CTGCCATGGAGGAGCCGCAG-CAGAT-CTAGCG-CGAGCCCCCTCTG 72  
||| ||||| | |||||||||||||||| ||||| ||||| |||||||||  
Sbjct 13 GCCTTCCGGGTCACTGCCATGGAGGAGCCGCAGTCAGATCCTAGCGTCGAGCCCCCTCTG 72  
  
Query 73 AGT-AGGAAACATTTTCAGACCTATGGAACTGTGAGTGGATCCATTGGAAGGGCAGGCC 131  
||| ||||||||||||||||||||||| ||||||||||||||||||||| |||||||||  
Sbjct 73 AGTCAGGAAACATTTTCAGACCTATGGAACTGTGAGTGGATCCATTGGAAGGGCAGGCC 132  
  
Query 132 CACCACCCGACCCCAACCCAGCCCCCTAGCAGAGACCTGTGGGAAAGCGAAAATTCAT 191  
||||||| ||||||||||||||||||| ||||||||||||||||||||| |||||||||  
Sbjct 133 CACCACCCGACCCCAACCCAGCCCCCTAGCAGAGACCTGTGGGAAAGCGAAAATTCAT 192  
  
Query 192 GGGACTGACTTCTGCTCTTGCTTTTCAGACTTCTGAAAACAACGTTCTGGT 244  
||||||||||||||||||||||||||| |||||||||||||||||||||  
Sbjct 193 GGGACTGACTTCTGCTCTTGCTTTTCAGACTTCTGAAAACAACGTTCTGGT 245

DSD-GCT4-ex2  
TP53-control

Query 51 AGCCGCAGT-AGATCCCTAGCG-CGAGCCCCCTCTGAG-CAGGAAAACATTTTCAAGACC 107  
||||||| |||| ||||||| ||||||||||||| |||| ||||||||| |||||  
Sbjct 38 AGCCGCAGTCAGAT-CCTAGCGTCGAGCCCCCTCTGAGTCAGG-AAACATTTTC-AGACC 94  
  
Query 108 TATGGAACTGTGAGTGGATCCATTGGAAGGGCAGGCCACCACCCCGACCCCAACCCC 167  
||||||||||||||||||||||| ||||||||||||||||||||| |||||||||  
Sbjct 95 TATGGAACTGTGAGTGGATCCATTGGAAGGGCAGGCCACCACCCCGACCCCAACCCC 153

Query 168 agcccccTAGCAGAGACCTGTGGGAAGCGAAAATTCCATGGGACTGACTTTCTGCTCTT 227  
|||||  
Sbjct 154 AGCCCCCTAGCAGAGACCTGTGGGAAGC-GAAAATTCCATGGGACTGACTTTCTGCTCTT 212

Query 228 GTCTTTCAGACTTCCTGAAAACAACGTTCTGG 259  
|||||  
Sbjct 213 GTCTTTCAGACTTCCTGAAAACAACGTTCTGG 244

DSD-GCT5-ex2  
TP53-control

Query 47 GGAGAGAGCCGAGT-AGATCTTAGCGTCGAGCCCCCTCTGAGTCAGGAAACATTTTCAG 105  
|||||  
Sbjct 33 GGAG-GAGCCGAGTCAGATCCTAGCGTCGAGCCCCCTCTGAGTCAGGAAACATTTTCAG 91

Query 106 ACCTATGGAAACTGTGAGTGGATCCATTGGAAGGGCAGGCCACCACCCCGACCCCAAC 165  
|||||  
Sbjct 92 ACCTATGGAAACTGTGAGTGGATCCATTGGAAGGGCAGGCCACCACCCCGACCCCAAC 150

Query 166 CCCAGCCCCCTAGCAGAGACCTGTGGGAAGCGAAAATTCCATGGGACTGACTTTCTGCTC 225  
|||||  
Sbjct 151 CCCAGCCCCCTAGCAGAGACCTGTGGGAAGCGAAAATTCCATGGGACTGACTTTCTGCTC 210

Query 226 TTGTCTTTCAGACTTCCTGAAAACAACGTTCTGGT 260  
|||||  
Sbjct 211 TTGTCTTTCAGACTTCCTGAAAACAACGTTCTGGT 245

CAIS-1-ex2  
TP53-control-ex2

Query 58 CTGCCTTCCGGGTACCTCGCCATGGAGGAACCGCAGTCAGATCCTAGCGTCGAGCCCC 117  
|||||  
Sbjct 11 CTGCCTTCCGGGTAC-T-GCCATGGAGGAGCCGAGTCAGATCCTAGCGTCGA-GCCCC 67

Query 118 CTCTGAGTCAGGAAACATTTTCAGACCTATGGAAACTGTGAGGTCAGATGCCACTTGGAA 177  
|||||  
Sbjct 68 CTCTGAGTCAGGAAACATTTTCAGACCTATGGAAACTGTGAG-TG-GAT-CCA-TTGGAA 123

Query 178 GGGCAGGCCACACCACCCCCACCCCAACGACCAGCCCCCTAAGCAGAAGAACCTGCGG 237  
|||||  
Sbjct 124 GGGCAGGCC-CACCAC-CCCCACCCCAACC--CCAGCCCCCTA-GCAGA-GA-CCTGTGG 176

Query 238 GAAGGCGAAAATTCCACGGGACTGTCTTTCTGCTCCTGTCTTTCAG-CTTCCTGAAAAC 296  
|||  
Sbjct 177 GAA-GCGAAAATTCCATGGGACTGACTTTCT-GCTCTGTCTTTCAGACTTCCTGAAAAC 234

Query 297 ACAACGTGCTGG 308  
|||  
Sbjct 235 A-A-CGTTCTGG 244

CAIS-4-ex2  
TP53-control-ex2

```
Query 65 AGCAGCCAGACTGCCTTCCGGGTCACCTGCCATGGAGGAGCCGAGTCAGATCCTAGCGTC 124
|||||
Sbjct 1 AGCAGCCAGACTGCCTTCCGGGTCACCTGCCATGGAGGAGCCGAGTCAGATCCTAGCGTC 60

Query 125 GAGCCCCCTCTGAGTCATGAAACATTTTCAG-CCTATGG-AACTGTGAGTGGATCCATTG 182
|||||
Sbjct 61 GAGCCCCCTCTGAGTCAGGAAACATTTTCAGACCTATGGAAACTGTGAGTGGATCCATTG 120

Query 183 GAAGGGCAGGCCACCACCCCAACCCAGCCCCCTAGCAGAGACCTGTGGGAAA 242
|||||
Sbjct 121 GAAGGGCAGGCCACCACCCCAACCCAGCCCCCTAGCAGAGACCTGTGGG-AA 179

Query 243 GCGAAAATTCATGGG-CTG-CTTTCTGCTCTTGTCTTTCAG-CTTCCTGAAA-CAACGT 298
|||||
Sbjct 180 GCGAAAATTCATGGGACTGACTTTCTGCTCTTGTCTTTCAGACTTCCTGAAAACAACGT 239

Query 299 -CTGG 302
||||
Sbjct 240 TCTGG 244
```

CAIS-5-ex2  
TP53-control-ex2

```
Query 1 AGCAGCCAGACTGCCTTCCGGGTCACCTGCCATGGAGGAGCCGAGTCAGATCCTAGCGTC 60
|||||
Sbjct 1 AGCAGCCAGACTGCCTTCCGGGTCACCTGCCATGGAGGAGCCGAGTCAGATCCTAGCGTC 60

Query 61 GAGCCCCCTCTGAGTCAGGAAACATTTTCAGACCTATGGAAACTGTGAGTGGATCCATTG 120
|||||
Sbjct 61 GAGCCCCCTCTGAGTCAGGAAACATTTTCAGACCTATGGAAACTGTGAGTGGATCCATTG 120

Query 121 GAAGGGCAGGCCACCACCCCAACCCAGCCCCCTAGCAGAGACCTGTGGGAAG 180
|||||
Sbjct 121 GAAGGGCAGGCCACCACCCCAACCCAGCCCCCTAGCAGAGACCTGTGGGAAG 180

Query 181 CGAAAATTCATGGGACTGACTTTCTGCTCTTGTCTTTCAGACTTCCTGAAAACAACGTT 240
|||||
Sbjct 181 CGAAAATTCATGGGACTGACTTTCTGCTCTTGTCTTTCAGACTTCCTGAAAACAACGTT 240

Query 241 CTGGT 245
||||
Sbjct 241 CTGGT 245
```

CAIS-6-exon2  
TP53-control

```
Query 36 AGCAGCCAGACTGCCTTCCGGGTCACCTGCCATGGAGGAGCCGAGTCAGATCCTAGCGTC 95
|||||
Sbjct 1 AGCAGCCAGACTGCCTTCCGGGTCACCTGCCATGGAGGAGCCGAGTCAGATCCTAGCGTC 60
```

Query 96 GAGCCCCCTCTGAGTCAGGAAACATTTTCAGACCTATGGAAACTGTGAGTGGATCCATTG 155  
|||||  
Sbjct 61 GAGCCCCCTCTGAGTCAGGAAACATTTTCAGACCTATGGAAACTGTGAGTGGATCCATTG 120

Query 156 GAAGGGCAGGCCACCACCCCGACCCCAACCCAGCCCCCTAGCAGAGACCTGTGGGAAG 215  
|||||  
Sbjct 121 GAAGGGCAGGCCACCACCCCGACCCCAACCCAGCCCCCTAGCAGAGACCTGTGGGAAG 180

Query 216 CGAAAATTCCATGGGACTGACTTTCTGCTCTTGTCTTTCAG-CTTCCTGAAAACAACGTT 274  
|||||  
Sbjct 181 CGAAAATTCCATGGGACTGACTTTCTGCTCTTGTCTTTCAGACTTCCTGAAAACAACGTT 240

Query 275 CTGG 278  
||||  
Sbjct 241 CTGG 244

CAIS-8-exon2  
TP53-control

Query 65 AGCAGCCAGACTGCCTTCCGGGTCACCTGCCATGGAGGAGCCGAGTCAGATCCTAGCGTC 124  
|||||  
Sbjct 1 AGCAGCCAGACTGCCTTCCGGGTCACCTGCCATGGAGGAGCCGAGTCAGATCCTAGCGTC 60

Query 125 GAGCCCCCTCTGAGTCAGGAAACATTTTCAGACCTATGG-AACTGTGAGTGGATCCATTG 183  
|||||  
Sbjct 61 GAGCCCCCTCTGAGTCAGGAAACATTTTCAGACCTATGGAAACTGTGAGTGGATCCATTG 120

Query 184 GAAGGGCAGGCCACCACCCCGACCCCAACCCAGCCCCCTAGCAGAGACCTGTGGGAAA 243  
|||||  
Sbjct 121 GAAGGGCAGGCCACCACCCCGACCCCAACCCAGCCCCCTAGCAGAGACCTGTGGG-AA 179

Query 244 GCGAAAATTCCATGGG-CTG-CTTTCTGCTCTTGTCTTTCAG-CTTCCTGAAA-CAACGT 299  
|||||  
Sbjct 180 GCGAAAATTCCATGGGACTGACTTTCTGCTCTTGTCTTTCAGACTTCCTGAAAACAACGT 239

Query 300 -CTGG 303  
||||  
Sbjct 240 TCTGG 244

CAIS-9-exon2  
TP53-control

Query 62 AGCAGCCAGACTGCCTTCCGGGTCACCTGCCATGGAGGAGCCGAGTCAGATCCTAGCGT 121  
|||||  
Sbjct 1 AGCAGCCAGACTGCCTT-CCGGGTCACCTGCCATGGAGGAGCCGAGTCAGATCCTAGCGT 59

Query 122 CGAGCCCCCTCTGAGTCAGGAAACATTTTCAGACCTATGGAAACTGTGAGTGGATCCATT 181  
|||||  
Sbjct 60 CGAGCCCCCTCTGAGTCAGGAAACATTTTCAGACCTATGGAAACTGTGAGTGGATCCATT 119

```

Query 182 GGAAAGGGCAGGCCACCACCCCG-CCCCAACCCAGCCCCCTAGCAGAG-CCTGTGG-A 238
      ||| ||||| ||||| ||||| ||||| ||||| ||||| ||||| ||||| ||||| |||||
Sbjct 120 GG-AAGGGCAGGCCACCACCCCAACCCAGCCCCCTAGCAGAGACCTGTGGGA 178

Query 239 AGCGAAA-TTCCATGG-ACTG-CTTTCTGCTCTGTCTTTCAG-CTTCTGAAA-CAACG 293
      ||| ||||| ||||| ||||| ||||| ||||| ||||| ||||| ||||| |||||
Sbjct 179 AGCGAAAATTCCATGGGACTGACTTTCTGCTCTGTCTTTCAGACTTCTGAAAACAACG 238

Query 294 T-CTGG 298
      | ||||
Sbjct 239 TTCTGG 244

CAIS-2-ex2 TTTTCTATGCTGGTCCCACCTTTCTCTTCAGAGCAGCTGCTTCCGGGGCCTCCATGGAGA 60
TP53-control-ex2 -----AGCAGCCAGACTGCCTTCCGGGTCACTG-----CCATGGAGGA 38
               *   **  * * * * * * *  *   * * *

CAIS-2-ex2 GCCGCAGTCAG-----TCCTACGTCAGCCCTCTAGTCAGAAACATTTTCACACCTATG 114
TP53-control-ex2 GCCGCAGTCAGATCCTAGCGTCGAGCCCTCTGAGTCAGGAAACATTTTCAGACCTATG 98
***** * * * * * * * * * * * * * * *

CAIS-2-ex2 AACTGTAGTGG---TCCATTGAA-GGGCAG-CCCACCACCC-GCCCAACCCAG-CC 167
TP53-control-ex2 GAAACTGTAGTGGATCCATTGGAAGGGCAGGCCACCACCCACCCCAACCCAGCC 158
      * *   * *   ***** * ***** ***** * * * * * *

CAIS-2-ex2 CCTA---GAAGCTGTGGG---AGGAAATTCATGG--GCTGCTTTCTGCTCTGTCTTT 219
TP53-control-ex2 CCTAGCAGAGACCTGTGGGAAGCGAAAATTCATGGGACTGACTTTCTGCTCTGTCTTT 218
      **** * *   ***** * ***** *****

CAIS-2-ex2 CAGCTTCTAAAACAACGTCTGGAATGTCAGGGTCTGCGGGCCTGGCTGGTCCGCCCC 279
TP53-control-ex2 CAGACTTCTGAAAACAACGTCTGTGGT----- 245
      *** * *   * * *   *

CAIS-3-ex2 ATTCTCATGCTGGTCCCACCTTTTTTTTTGAGCAGCCAGCTGCTTCCGGGTCACTGCCAT 60
TP53-control-ex2 -----AGCAGCCAGACTGCCTTCCGGGTCACTGCCAT 32
               *   *   *****

CAIS-3-ex2 GAGAGCGCAGTC---AGTCCTAGCGTCA---GCCCTCTAGTCAGAAACATTTTCAGC 113
TP53-control-ex2 GGAGGAGCCGCGAGTCAGATCCTAGCGTCGAGCCCTCTGAGTCAGGAAACATTTTCAGA 92
      * * * * *   ***** * * * * *   *****

CAIS-3-ex2 CTATGAACT---GTAGTGATCCATTGAAGGGAGGCCACCA---CCCCGCCCAACCC 165
TP53-control-ex2 CCTATGAAACTGTGAGTGGATCCATTGGAAGGGCAGGCCACCACCCCAACCC 152
      * * *   *   ***** * * *   *** * * * * * *

CAIS-3-ex2 CAGC-CCCTAGAA---GCCTGTGGA---AGGAAATTCATGGGCTGCTTT---CTGTCTT 215
TP53-control-ex2 CAGCCCTAGCAGAGACCTGTGGGAAGCGAAAATTCATGGGACTGACTTTCTGCTCTT 212
      **** * * * * * * *   ***** * ***** * * * * *

CAIS-3-ex2 GTCTTTCAGCTTCC--TAAAACAACGTCTGGAATGGCAGGGTGGCTGGGGCCAGCGATCT 273
TP53-control-ex2 GTCTTTCAGACTTCTGAAAACAACGTCTGTGGT----- 245
      ***** * *   ***** *

CAIS-7-ex2 TATTCTCATGCTGATCCCACCTTTTTTTTTTGCAGGAGGCAGCTGCTTCCGGGTCACTG 60
TP53-control-ex2 -----AGCAGCCAGACTGCCTTCCGGGTCACTG 28
               *** *****

CAIS-7-ex2 CCATGGCGAGCCG-CAG-TCTGTCTAGCGTCGTGCCCCCTCTA--GTCAGAAACATTTT 116
TP53-control-ex2 CCATGGAGGAGCCGAGTCAGATCCTAGCGTCGAGCCCTCTGAGTCAGGAAACATTTT 88
      ***** * * * * *   ***** ***** *****

CAIS-7-ex2 CAGCCTATGAACTGTA---GTGATCCA-TTGAAGGGCAGGCCACCACCCGCCCCAA 171
TP53-control-ex2 CAGACCTATGAAACTGTGAGTGGATCCATTGGAAGGGCAGGCCACCACCCCAACCCCA 148
      *** * * * * * * * ***** * * * * * * * * * *

CAIS-7-ex2 CC-CCAGCC-CCTAG---AAGCCTGTGG--AA-GGAAATTCATG--GGCTGTCTTCTGC 221
TP53-control-ex2 ACCCCAGCCCTAGCAGAGACCTGTGGGAAGCGAAAATTCATGGGACTGACTTTCTGC 208
      * ***** * * * * * * * * * * * * * * * *

```



```
CAIS-7-ex2          TCTTGTCTTTCAGCTTCTA--AAACAACGTTCTGGAATGGCAGGGTGGGTGGGGCCCGC 279
TP53-control-ex2   TCTTGTCTTTCAGACTTCTGAAAACAACGTTCTGGT----- 245
                   ***** * * *****
```

CAIS-GCT-exon2
TP53-control

```
Query 18  TCCGGGTC-CT-CCAT-GAGGAG-CG-AG-CAGA-CCTAGCG-CGAGCCCC-CTGAG-C 67
          |||||  |  ||||  |||||  ||  |  ||||  |||||  |||||  |||||
Sbjct 17  TCCGGGTCACTGCCATGGAGGAGCCGAGTCAGATCCTAGCGTCGAGCCCCCTCTGAGTC 76

Query 68  AGG-AACA-TTTCAGACCTATGGAACTGTGAGTGGAT-CATTGGAAGGGCAGGCCACC 124
          |||  |||  |||||  |||||  |||||  |||||  |||||  |||||
Sbjct 77  AGGAAACATTTTCAGACCTATGGAACTGTGAGTGGATCCATTGGAAGGGCAGGCCACC 136

Query 125  ACCCCCGACCCCAACCCAGCCCCCTAGCAGAGACCTGTGGGAAGCGAAAATTCCATGGG 184
          |||||  |||||  |||||  |||||  |||||  |||||  |||||  |||||
Sbjct 137  ACCCCG-ACCCCAACCCAGCCCCCTAGCAGAGACCTGTGGGAAGCGAAAATTCCATGGG 195

Query 185  ACTGACTTTCTGCTCTTGTCTTTCAGACTTCCTGAAAACAACGTTCTGGT 234
          |||||  |||||  |||||  |||||  |||||  |||||  |||||  |||||
Sbjct 196  ACTGACTTTCTGCTCTTGTCTTTCAGACTTCCTGAAAACAACGTTCTGGT 245
```

Turner-1-exon2
TP53-control

```
Query 1  AGCAGCCAGACTGCCTTCCGGGTCACTGCCATGGAGGAGCCGAGTCAGATCCTAGCGTC 60
          |||||  |||||  |||||  |||||  |||||  |||||  |||||  |||||
Sbjct 1  AGCAGCCAGACTGCCTTCCGGGTCACTGCCATGGAGGAGCCGAGTCAGATCCTAGCGTC 60

Query 61  GAGCCCCCTCTGAGTCAGGAAACATTTTCAGACCTATGGAACTGTGAGTGGATCCATTG 120
          |||||  |||||  |||||  |||||  |||||  |||||  |||||  |||||
Sbjct 61  GAGCCCCCTCTGAGTCAGGAAACATTTTCAGACCTATGGAACTGTGAGTGGATCCATTG 120

Query 121  GAAGGGCAGGCCACCACCCCAACCCAGCCCCCTAGCAGAGACCTGTGGGAAG 180
          |||||  |||||  |||||  |||||  |||||  |||||  |||||  |||||
Sbjct 121  GAAGGGCAGGCCACCACCCCAACCCAGCCCCCTAGCAGAGACCTGTGGGAAG 180

Query 181  CGAAAATTCCATGGGACTGACTTTCTGCTCTTGTCTTTCAGACTTCCTGAAAACAACGTT 240
          |||||  |||||  |||||  |||||  |||||  |||||  |||||  |||||
Sbjct 181  CGAAAATTCCATGGGACTGACTTTCTGCTCTTGTCTTTCAGACTTCCTGAAAACAACGTT 240

Query 241  CTGGT 245
          ||||
Sbjct 241  CTGGT 245
```

Turner-2-exon2
TP53-control

```
Query 19  GCCGTCCGGGCTA-TGCCATGGAGGAGCCGAG-CAGAT-CTAGCG-CGAGCCCCCTCTG 74
          |||  |||||  |  |||||  |||||  |||||  |||||  |||||
Sbjct 13  GCCTTCCGGGTCACTGCCATGGAGGAGCCGAGTCAGATCCTAGCGTCGAGCCCCCTCTG 72
```

Query 75 AGTCAGGAAACATTTTCAGACCTATGGAAACTGTGAGTGGATCCATTGGAAGGGCAGGCC 134  
|||||

Sbjct 73 AGTCAGGAAACATTTTCAGACCTATGGAAACTGTGAGTGGATCCATTGGAAGGGCAGGCC 132

Query 135 CACCACCCCGACCCCAACCCAGCCCCCTAGCAGAGACCTGTGGGAAGCGAAAATTCCAT 194  
|||||

Sbjct 133 CACCACCCCGACCCCAACCCAGCCCCCTAGCAGAGACCTGTGGGAAGCGAAAATTCCAT 192

Query 195 GGGACTGACTTTCTGCTCTTGTCTTTCAGACTTCCTGAAAACAACGTTCTGGT 247  
|||||

Sbjct 193 GGGACTGACTTTCTGCTCTTGTCTTTCAGACTTCCTGAAAACAACGTTCTGGT 245

Turner-3-exon2  
TP53-control

Query 17 CTTCCGTCCGGGCTA-TGCCATGGAGGAGCCGCAG-CAGATCCTAGCGT-GAGCCCCCTC 73  
|| || ||||| |

Sbjct 11 CTGCCTTCCGGGTCAC TGCCATGGAGGAGCCGCAGT-CAGATCCTAGCGT-GAGCCCCCTC 70

Query 74 TGAGTCAGGAAACATTTTCAGACCTATGGAAACTGTGAGTGGATCCATTGGAAGGGCAGG 133  
|||||

Sbjct 71 TGAGTCAGGAAACATTTTCAGACCTATGGAAACTGTGAGTGGATCCATTGGAAGGGCAGG 130

Query 134 CCCACCACCCCGACCCCAACCCAGCCCCCTAGCAGAGACCTGTGGGAAGCGAAAATTCC 193  
|||||

Sbjct 131 CCCACCACCCCGACCCCAACCCAGCCCCCTAGCAGAGACCTGTGGGAAGCGAAAATTCC 190

Query 194 ATGGGACTGACTTTCTGCTCTTGTCTTTCAGACTTCCTGAAAACAACGTTCTGGT 248  
|||||

Sbjct 191 ATGGGACTGACTTTCTGCTCTTGTCTTTCAGACTTCCTGAAAACAACGTTCTGGT 245

Turner-4-exon2  
TP53-control

Query 17 CTTCCGTCCGGGCTA-TGCCATGGAGGAGCCGCAG-CAGATCCTAGCGT-GAGCCCCCTC 73  
|| || ||||| |

Sbjct 11 CTGCCTTCCGGGTCAC TGCCATGGAGGAGCCGCAGT-CAGATCCTAGCGT-GAGCCCCCTC 70

Query 74 TGAGTCAGGAAACATTTTCAGACCTATGGAAACTGTGAGTGGATCCATTGGAAGGGCAGG 133  
|||||

Sbjct 71 TGAGTCAGGAAACATTTTCAGACCTATGGAAACTGTGAGTGGATCCATTGGAAGGGCAGG 130

Query 134 CCCACCACCCCGACCCCAACCCAGCCCCCTAGCAGAGACCTGTGGGAAGCGAAAATTCC 193  
|||||

Sbjct 131 CCCACCACCCCGACCCCAACCCAGCCCCCTAGCAGAGACCTGTGGGAAGCGAAAATTCC 190

Query 194 ATGGGACTGACTTTCTGCTCTTGTCTTTCAGACTTCCTGAAAACAACGTTCTGGT 248  
|||||

Sbjct 191 ATGGGACTGACTTTCTGCTCTTGTCTTTCAGACTTCCTGAAAACAACGTTCTGGT 245

Turner-5-exon2  
TP53-control

```
Query 1 AGCAGCCAGACTGCCTTCCGGGTCACCTGCCATGGAGGAGCCGAGTCAGATCCTAGCGTC 60
|||||
Sbjct 1 AGCAGCCAGACTGCCTTCCGGGTCACCTGCCATGGAGGAGCCGAGTCAGATCCTAGCGTC 60

Query 61 GAGCCCCCTCTGAGTCAGGAAACATTTTCAGACCTATGGAAACTGTGAGTGGATCCATTG 120
|||||
Sbjct 61 GAGCCCCCTCTGAGTCAGGAAACATTTTCAGACCTATGGAAACTGTGAGTGGATCCATTG 120

Query 121 GAAGGGCAGGCCACCACCCCAACCCCAAGCCCCCTAGCAGAGACCTGTGGGAAG 180
|||||
Sbjct 121 GAAGGGCAGGCCACCACCCCAACCCCAAGCCCCCTAGCAGAGACCTGTGGGAAG 180

Query 181 CGAAAATTCATGGGACTGACTTTCTGCTCTTGTCTTTCAGACTTCCTGAAAACAACGTT 240
|||||
Sbjct 181 CGAAAATTCATGGGACTGACTTTCTGCTCTTGTCTTTCAGACTTCCTGAAAACAACGTT 240

Query 241 CTGGT 245
|||||
Sbjct 241 CTGGT 245
```

Turner-6-exon2  
TP53-control

```
Query 23 CTTCCGGGGCCTAGTGCCATGGAGGAGCCGAG-CAGATCCTAGCGTCGAGCCCCCTCTG 81
|||||
Sbjct 15 CTTCC-GGGTC-ACTGCCATGGAGGAGCCGAGTCAGATCCTAGCGTCGAGCCCCCTCTG 72

Query 82 AGTCAGGAAACATTTTCAGACCTATGGAAACTGTGAGTGGATCCATTGGAAGGCAGGCC 141
|||||
Sbjct 73 AGTCAGGAAACATTTTCAGACCTATGGAAACTGTGAGTGGATCCATTGGAAGGCAGGCC 132

Query 142 CACCACCCCGACCCCAACCCCAAGCCCCCTAGCAGAGACCTGTGGGAAGCGAAAATTCCA 201
|||||
Sbjct 133 CACCACCCCG-ACCCCAACCCCAAGCCCCCTAGCAGAGACCTGTGGGAAGCGAAAATTCCA 191

Query 202 TGGGACTGACTTTCTGCTCTTGTCTTTCAGACTTCCTGAAAACAACGTTCTGGT 255
|||||
Sbjct 192 TGGGACTGACTTTCTGCTCTTGTCTTTCAGACTTCCTGAAAACAACGTTCTGGT 245
```

Turner-7-exon2  
TP53-control

```
Query 1 AGCAGCCAGACTGCCTTCCGGGTCACCTGCCATGGAGGAGCCGAGTCAGATCCTAGCGTC 60
|||||
Sbjct 1 AGCAGCCAGACTGCCTTCCGGGTCACCTGCCATGGAGGAGCCGAGTCAGATCCTAGCGTC 60

Query 61 GAGCCCCCTCTGAGTCAGGAAACATTTTCAGACCTATGGAAACTGTGAGTGGATCCATTG 120
|||||
Sbjct 61 GAGCCCCCTCTGAGTCAGGAAACATTTTCAGACCTATGGAAACTGTGAGTGGATCCATTG 120
```

Query 121 GAAGGGCAGGCCACCACCCCAACCCAGCCCCCTAGCAGAGACCTGTGGGAAG 180  
|||||  
Sbjct 121 GAAGGGCAGGCCACCACCCCAACCCAGCCCCCTAGCAGAGACCTGTGGGAAG 180

Query 181 CGAAAATTCATGGGACTGACTTTCTGCTCTTGTCTTTCAGACTTCCTGAAAACAACGTT 240  
|||||  
Sbjct 181 CGAAAATTCATGGGACTGACTTTCTGCTCTTGTCTTTCAGACTTCCTGAAAACAACGTT 240

Query 241 CTGGT 245  
|||||  
Sbjct 241 CTGGT 245

Turner-8-exon2  
TP53-control

Query 1 AGCAGCCAGACTGCCTTCCGGGTCAGTCCATGGAGGAGCCGAGTCAGATCCTAGCGTC 60  
|||||  
Sbjct 1 AGCAGCCAGACTGCCTTCCGGGTCAGTCCATGGAGGAGCCGAGTCAGATCCTAGCGTC 60

Query 61 GAGCCCCCTCTGAGTCAGGAAACATTTTCAGACCTATGGAAACTGTGAGTGGATCCATTG 120  
|||||  
Sbjct 61 GAGCCCCCTCTGAGTCAGGAAACATTTTCAGACCTATGGAAACTGTGAGTGGATCCATTG 120

Query 121 GAAGGGCAGGCCACCACCCCAACCCAGCCCCCTAGCAGAGACCTGTGGGAAG 180  
|||||  
Sbjct 121 GAAGGGCAGGCCACCACCCCAACCCAGCCCCCTAGCAGAGACCTGTGGGAAG 180

Query 181 CGAAAATTCATGGGACTGACTTTCTGCTCTTGTCTTTCAGACTTCCTGAAAACAACGTT 240  
|||||  
Sbjct 181 CGAAAATTCATGGGACTGACTTTCTGCTCTTGTCTTTCAGACTTCCTGAAAACAACGTT 240

Query 241 CTGGT 245  
|||||  
Sbjct 241 CTGGT 245

Turner-9-exon2  
TP53-control

Query 1 AGCAGCCAGACTGCCTTCCGGGTCAGTCCATGGAGGAGCCGAGTCAGATCCTAGCGTC 60  
|||||  
Sbjct 1 AGCAGCCAGACTGCCTTCCGGGTCAGTCCATGGAGGAGCCGAGTCAGATCCTAGCGTC 60

Query 61 GAGCCCCCTCTGAGTCAGGAAACATTTTCAGACCTATGGAAACTGTGAGTGGATCCATTG 120  
|||||  
Sbjct 61 GAGCCCCCTCTGAGTCAGGAAACATTTTCAGACCTATGGAAACTGTGAGTGGATCCATTG 120

Query 121 GAAGGGCAGGCCACCACCCCAACCCAGCCCCCTAGCAGAGACCTGTGGGAAG 180  
|||||  
Sbjct 121 GAAGGGCAGGCCACCACCCCAACCCAGCCCCCTAGCAGAGACCTGTGGGAAG 180

Query 181 CGAAAATTCCATGGGACTGACTTTCTGCTCTTGTCTTTCAGACTTCCTGAAAACAACGTT 240  
|||||  
Sbjct 181 CGAAAATTCCATGGGACTGACTTTCTGCTCTTGTCTTTCAGACTTCCTGAAAACAACGTT 240

Query 241 CTGGT 245  
|||||  
Sbjct 241 CTGGT 245

Turner-10-exon2  
TP53-control

Query 43 GCAGCCAGACTGGCTTCCGGGTCACTGCCATGGAGGAGCCGCAGTCAGATCCTAGCGTCG 102  
|||||  
Sbjct 2 GCAGCCAGACTGCCTTCCGGGTCACTGCCATGGAGGAGCCGCAGTCAGATCCTAGCGTCG 61

Query 103 AGCCCCCTCTGAGTCAGGAAACATTTTCAGACCTATGGAAACTGTGAGTGGATCCATTGG 162  
|||||  
Sbjct 62 AGCCCCCTCTGAGTCAGGAAACATTTTCAGACCTATGGAAACTGTGAGTGGATCCATTGG 121

Query 163 AAAGGGCAGGCCACCACCCCGACCCCAACCCAGCCCCCTAGCAGAGACCTGTGGGAAG 222  
|||||  
Sbjct 122 -AAGGGCAGGCCACCACCCCGACCCCAACCCAGCCCCCTAGCAGAGACCTGTGGGAAG 180

Query 223 CGAAAATTCCATGGGACTG-CTTTCTGCTCTTGTCTTTCAG-CTTCCTGAAAACAACGTT 280  
|||||  
Sbjct 181 CGAAAATTCCATGGGACTGACTTTCTGCTCTTGTCTTTCAGACTTCCTGAAAACAACGTT 240

Query 281 CTGG 284  
|||||  
Sbjct 241 CTGG 244

Turner-11-exon2  
TP53-control

Query 39 AGCAGGCCAAGACTGGCTTTCCGGGTCACTGCCATGGAGGAGCCGCAGTCAGATTCCTA 98  
|||||  
Sbjct 1 AGCA-GCC-AGACT-GCCTT-CCGGGTCACTGCCATGGAGGAGCCGCAGTCAGA-TCCTA 55

Query 99 GCGTCGAGCCCCCTCTGAGTCAGGAAACATTTTCAGACCTATGGAAACTGTGAGTGGATC 158  
|||||  
Sbjct 56 GCGTCGAGCCCCCTCTGAGTCAGGAAACATTTTCAGACCTATGGAAACTGTGAGTGGATC 115

Query 159 CATTGGAAAGGGCAGGCCACCACCCCGACCCCAACCCAGCCCCCTAGCAGAGACCTGT 218  
|||||  
Sbjct 116 CATTGG-AAGGGCAGGCCACCACCCCGACCCCAACCCAGCCCCCTAGCAGAGACCTGT 174

Query 219 GGAAGCGAAAATTCCATGGGACTG-CTTTCTGCTCTT-TCTTTCAG-CTTCCTGAAA-C 274  
|||||  
Sbjct 175 GGAAGCGAAAATTCCATGGGACTGACTTTCTGCTCTTGTCTTTCAGACTTCCTGAAAAC 234

Query 275 AACGT-CTGG 283  
|||||  
Sbjct 235 AACGTTCTGG 244

Klinefelter-1-exon2  
TP53-control

Query 1 AGCAGCCAGACTGCCTTCCGGGTCACCTGCCATGGAGGAGCCGAGTCAGATCCTAGCGTC 60  
|||||  
Sbjct 1 AGCAGCCAGACTGCCTTCCGGGTCACCTGCCATGGAGGAGCCGAGTCAGATCCTAGCGTC 60

Query 61 GAGCCCCCTCTGAGTCAGGAAACATTTTCAGACCTATGGAAACTGTGAGTGGATCCATTG 120  
|||||  
Sbjct 61 GAGCCCCCTCTGAGTCAGGAAACATTTTCAGACCTATGGAAACTGTGAGTGGATCCATTG 120

Query 121 GAAGGGCAGGCCACCACCCCAACCCAGCCCCCTAGCAGAGACCTGTGGGAAG 180  
|||||  
Sbjct 121 GAAGGGCAGGCCACCACCCCAACCCAGCCCCCTAGCAGAGACCTGTGGGAAG 180

Query 181 CGAAAATTCCATGGGACTGACTTTCTGCTCTTGTCTTTCAGACTTCCTGAAAACAACGTT 240  
|||||  
Sbjct 181 CGAAAATTCCATGGGACTGACTTTCTGCTCTTGTCTTTCAGACTTCCTGAAAACAACGTT 240

Query 241 CTGGT 245  
|||||  
Sbjct 241 CTGGT 245

Klinefelter-2-exon2  
TP53-control

Query 1 AGCAGCCAGACTGCCTTCCGGGTCACCTGCCATGGAGGAGCCGAGTCAGATCCTAGCGTC 60  
|||||  
Sbjct 1 AGCAGCCAGACTGCCTTCCGGGTCACCTGCCATGGAGGAGCCGAGTCAGATCCTAGCGTC 60

Query 61 GAGCCCCCTCTGAGTCAGGAAACATTTTCAGACCTATGGAAACTGTGAGTGGATCCATTG 120  
|||||  
Sbjct 61 GAGCCCCCTCTGAGTCAGGAAACATTTTCAGACCTATGGAAACTGTGAGTGGATCCATTG 120

Query 121 GAAGGGCAGGCCACCACCCCAACCCAGCCCCCTAGCAGAGACCTGTGGGAAG 180  
|||||  
Sbjct 121 GAAGGGCAGGCCACCACCCCAACCCAGCCCCCTAGCAGAGACCTGTGGGAAG 180

Query 181 CGAAAATTCCATGGGACTGACTTTCTGCTCTTGTCTTTCAGACTTCCTGAAAACAACGTT 240  
|||||  
Sbjct 181 CGAAAATTCCATGGGACTGACTTTCTGCTCTTGTCTTTCAGACTTCCTGAAAACAACGTT 240

Query 241 CTGGT 245  
|||||  
Sbjct 241 CTGGT 245

Klinefelter-3-exon2  
TP53-control

```
Query 24 TCCGGGCTA-TGCCATGGAGGAGCCGAG-CAGAT-CTAGCG-CGAGCCCCCTCTGAG-C 78
      ||||| | |||
Sbjct 17 TCCGGGTCACTGCCATGGAGGAGCCGAGTCAGATCCTAGCGTCGAGCCCCCTCTGAGTC 76

Query 79 AGGAAACATTTTCAGACCTATGGAAACTGTGAGTGGATCCATTGGAAGGGCAGGCCACC 138
      |||
Sbjct 77 AGGAAACATTTTCAGACCTATGGAAACTGTGAGTGGATCCATTGGAAGGGCAGGCCACC 136

Query 139 ACCCCGACCCCAACCCAGCCCCCTAGCAGAGACCTGTGGGAAGCGAAAATTCATGGGA 198
      |||||
Sbjct 137 ACCCCGACCCCAACCCAGCCCCCTAGCAGAGACCTGTGGGAAGCGAAAATTCATGGGA 196

Query 199 CTGACTTCTGCTCTTGTCTTTCAGACTTCCTGAAAACAACGTTCTGGT 247
      |||
Sbjct 197 CTGACTTCTGCTCTTGTCTTTCAGACTTCCTGAAAACAACGTTCTGGT 245
```

Klinefelter-4-exon2  
TP53-control

```
Query 1 AGCAGCCAGACTGCCTTCCGGGTCAGTCCATGGAGGAGCCGAGTCAGATCCTAGCGTC 60
      |||
Sbjct 1 AGCAGCCAGACTGCCTTCCGGGTCAGTCCATGGAGGAGCCGAGTCAGATCCTAGCGTC 60

Query 61 GAGCCCCCTCTGAGTCAGGAAACATTTTCAGACCTATGGAAACTGTGAGTGGATCCATTG 120
      |||
Sbjct 61 GAGCCCCCTCTGAGTCAGGAAACATTTTCAGACCTATGGAAACTGTGAGTGGATCCATTG 120

Query 121 GAAGGGCAGGCCACCACCCCAACCCAGCCCCCTAGCAGAGACCTGTGGGAAG 180
      |||
Sbjct 121 GAAGGGCAGGCCACCACCCCAACCCAGCCCCCTAGCAGAGACCTGTGGGAAG 180

Query 181 CGAAAATTCATGGGACTGACTTCTGCTCTTGTCTTTCAGACTTCCTGAAAACAACGTT 240
      |||
Sbjct 181 CGAAAATTCATGGGACTGACTTCTGCTCTTGTCTTTCAGACTTCCTGAAAACAACGTT 240

Query 241 CTGGT 245
      |||
Sbjct 241 CTGGT 245
```

Klinefelter-5-exon2  
TP53-control

```
Query 1 AGCAGCCAGACTGCCTTCCGGGTCAGTCCATGGAGGAGCCGAGTCAGATCCTAGCGTC 60
      |||
Sbjct 1 AGCAGCCAGACTGCCTTCCGGGTCAGTCCATGGAGGAGCCGAGTCAGATCCTAGCGTC 60
```

```

Query 61 GAGCCCCCTCTGAGTCAGGAAACATTTTCAGACCTATGGAAACTGTGAGTGGATCCATTG 120
      |||||||
Sbjct 61 GAGCCCCCTCTGAGTCAGGAAACATTTTCAGACCTATGGAAACTGTGAGTGGATCCATTG 120

Query 121 GAAGGGCAGGCCACCACCCCAACCCAGCCCCCTAGCAGAGACCTGTGGGAAG 180
      |||||||
Sbjct 121 GAAGGGCAGGCCACCACCCCAACCCAGCCCCCTAGCAGAGACCTGTGGGAAG 180

Query 181 CGAAAATTCCATGGGACTGACTTTCTGCTCTTGTCTTTCAGACTTCCTGAAAACAACGTT 240
      |||||||
Sbjct 181 CGAAAATTCCATGGGACTGACTTTCTGCTCTTGTCTTTCAGACTTCCTGAAAACAACGTT 240

Query 241 CTGGT 245
      ||||
Sbjct 241 CTGGT 245

```

Klinefelter-6-exon2  
TP53-control

```

Query 39 AGCAGGCCAGGACCTGCCTTCCCGGGTCACTGCCATGGAGGAGCCGCAGTCAGATCCTAG 98
      |||| |||| | |||||||
Sbjct 1 AGCA-GCCA-GA-CTGCCTT-CCGGGTCACTGCCATGGAGGAGCCGCAGTCAGATCCTAG 56

Query 99 CGTCGAGCCCCCTCTGAGTCAAGGAAACATTTTCAGACCTATGGAAACTGTGAGTGGATC 158
      |||||||
Sbjct 57 CGTCGAGCCCCCTCTGAGTC-AGGAAACATTTTCAGACCTATGGAAACTGTGAGTGGATC 115

Query 159 CATTGGAAGGGGCAGGCCACCACCCCAACCCAGCCCCCTAGCAGAGACCTG 218
      |||| |||| |||||||
Sbjct 116 CATT-GGAA-GGGCAGGCCACCACCCCAACCCAGCCCCCTAGCAGAGACCTG 173

Query 219 TGGGAAGCGAAAATTCATGGGACTG-CTTTCTGCTCTTGTCTTTCAG-CTTCCTGAAA- 275
      |||||||
Sbjct 174 TGGGAAGCGAAAATTCATGGGACTGACTTTCTGCTCTTGTCTTTCAGACTTCCTGAAAA 233

Query 276 CAACGT-CTGG 285
      ||||| ||||
Sbjct 234 CAACGTCTCTGG 244

```

### Exon 4 TP53 alignment to reference sequence.

Swyer-1-exon4  
TP53-control

```

Query 36 TTGCCGTCCCAAGCAATGGATGATTTGATGCTGTCCCGGACGATATTGAACAATGGTTC 95
      |||||||
Sbjct 9 TTGCCGTCCCAAGCAATGGATGATTTGATGCTGTCCCGGACGATATTGAACAATGGTTC 68

Query 96 ACTGAAGACCCAGGTCCAGATGAAGCTCCAGAATGCCAGAGGCTGCTCCCCCGTGGCC 155
      |||||||
Sbjct 69 ACTGAAGACCCAGGTCCAGATGAAGCTCCAGAATGCCAGAGGCTGCTCCCCCGTGGCC 128

```



Query 156 CCCGCACCAGCAGCTCCTACACCGGGCGGCCCTGCACCAGCCCCCTCCTGGCCCCGTCA 215  
|||  
Sbjct 129 CCTGCACCAGCAGCTCCTACACCGGGCGGCCCTGCACCAGCCCCCTCCTGGCCCCGTCA 188

Query 216 TCTTCTGTCCCTTCCCAGAAAACCTACCAGGGCAGCTACGGTTTCCGTCTGGGCTTCTTG 275  
|||  
Sbjct 189 TCTTCTGTCCCTTCCCAGAAAACCTACCAGGGCAGCTACGGTTTCCGTCTGGGCTTCTTG 248

Query 276 CATTCTGGGACAGCCAAGTCTG-G-CTCGCACG 306  
|||  
Sbjct 249 CATTCTGGGACAGCCAAGTCTGTGACTTGCACG 281

Swyer-2-exon4  
TP53-control

Query 34 CCTTGCCGTCCCAAGCAATGGATGATTTGATGCTGTCCCCGGACGATATTGAACAATGGT 93  
|||  
Sbjct 7 CCTTGCCGTCCCAAGCAATGGATGATTTGATGCTGTCCCCGGACGATATTGAACAATGGT 66

Query 94 TCACTGAAGACCCAGGTCCAGATGAAGCTCCCAGAATGCCAGAGGCTGCTCCCCCGCGT 153  
|||  
Sbjct 67 TCACTGAAGACCCAGGTCCAGATGAAGCTCCCAGAATGCCAGAGGCTGCTCCCC--CGT 124

Query 154 GGCCCCCTGCACCAGCAGCTCCTACACCGGGCGGCCCTGCACCAGCCCCCTCCTGGCCCCCT 213  
|||  
Sbjct 125 GGCCCCCTGCACCAGCAGCTCCTACACCGGGCGGCCCTGCACCAGCCCCCTCCTGGCCCCCT 184

Query 214 GTCATCTTCTGTCCCTTCCCAGAAAACCTACCAGGGCAGCTACGGTTTCCGTCTGGGCTT 273  
|||  
Sbjct 185 GTCATCTTCTGTCCCTTCCCAGAAAACCTACCAGGGCAGCTACGGTTTCCGTCTGGGCTT 244

Query 274 CTTGCATTCTGGGACAGCCAAGTCTG-G-CTTGCA 306  
|||  
Sbjct 245 CTTGCATTCTGGGACAGCCAAGTCTGTGACTTGCA 279

Swyer-3-exon4  
TP53-control

Query 1 AGTCCCCCTTGCCGTCCCAAGCAATGGATGATTTGATGCTGTCCCCG-CGATATTGAAC 59  
|||  
Sbjct 1 AGTCCCCCTTGCCGTCCCAAGCAATGGATGATTTGATGCTGTCCCCGACGATATTGAAC 60

Query 60 AATGGTTCACCTGAAGACCCAGGTCCAGATGAAGCTCCCAGAATGCCAGAGGCTGCTCCCC 119  
|||  
Sbjct 61 AATGGTTCACCTGAAGACCCAGGTCCAGATGAAGCTCCCAGAATGCCAGAGGCTGCTCCCC 120

Query 120 GCGTGGCCCCCTGCACCAGCAGCTCCTACACCGGGCGGCCCTGCACCAGCCCCCTCCTGGC 179  
|||  
Sbjct 121 CCGTGGCCCCCTGCACCAGCAGCTCCTACACCGGGCGGCCCTGCACCAGCCCCCTCCTGGC 180

Query 180 CCCTGTCATCTTCTGTCCCTTCCCAGAAAACCTACCAGGGCAGCTACGGTTTCCGTCTGG 239  
 |||  
 Sbjct 181 CCCTGTCATCTTCTGTCCCTTCCCAGAAAACCTACCAGGGCAGCTACGGTTTCCGTCTGG 240

Query 240 GCTTCTTGCAATCTGGGACAGCCAAGTCTGTGACTTTGCACGG 282  
 |||  
 Sbjct 241 GCTTCTTGCAATCTGGGACAGCCAAGTCTGTGACTT-GCACGG 282

Swyer-4-exon4  
 TP53-control

Query 34 CTGCCGTCCTCAAGCAATGGATGATTTGATGCTGTCCCCGGACGATATTGAACAATGGTT 93  
 |||  
 Sbjct 8 CTGCCGTCCTCAAGCAATGGATGATTTGATGCTGTCCCCGGACGATATTGAACAATGGTT 67

Query 94 CACTGAAGACCCAGGTCCAGATGAAGCTCCAGAATGCCAGAGGCTGCTCCCCCGTGGC 153  
 |||  
 Sbjct 68 CACTGAAGACCCAGGTCCAGATGAAGCTCCAGAATGCCAGAGGCTGCTCCCCCGTGGC 127

Query 154 CCCCACACCAGCAGCTCCTACACCGCGGCCCTGCACCAGCCCCCTCCTGGCCCCTGTC 213  
 |||  
 Sbjct 128 CCCTGCACCAGCAGCTCCTACACCGCGGCCCTGCACCAGCCCCCTCCTGGCCCCTGTC 187

Query 214 ATCTTCTGTCCCTTCCCAGAAAACCTACCAGGGCAGCTACGGTTTCCGTCTGGGCTTCTT 273  
 |||  
 Sbjct 188 ATCTTCTGTCCCTTCCCAGAAAACCTACCAGGGCAGCTACGGTTTCCGTCTGGGCTTCTT 247

Query 274 GCATTCTGGGACAGCCAAGTCTG--ACTTGCA 303  
 |||  
 Sbjct 248 GCATTCTGGGACAGCCAAGTCTGTGACTTGCA 279

Swyer-5-exon4  
 TP53-control

Query 84 AGTCTCCCTCTTTGCCGTCCCAAGCAATGGATGATTTGATGCTGTCCCCGGACGATATTG 143  
 |||  
 Sbjct 1 AGTC-CCC-C-TTGCCGTCCCAAGCAATGGATGATTTGATGCTGTCCCCGGACGATATTG 57

Query 144 AACAAATGGTTCACTGAAGACCCAGGTCCAGATGAAGCTCCAGAATGCCAGAGGCTGCTC 203  
 |||  
 Sbjct 58 AACAAATGGTTCACTGAAGACCCAGGTCCAGATGAAGCTCCAGAATGCCAGAGGCTGCTC 117

Query 204 CCCCACACCAGCAGCTCCTACACCGCGGCCCTGCACCAGCCCCCTC 263  
 |||  
 Sbjct 118 CCCC--CGTGGCCCCTGCACCAGCAGCTCCTACACCGCGGCCCTGCACCAGCCCCCTC 175

Query 264 CTGGCCCCTGTCATCTTCTGTCCCTTCCCAGAAAACCTACCAGGGCAGCTACGGTTTCCG 323  
 |||  
 Sbjct 176 CTGGCCCCTGTCATCTTCTGTCCCTTCCCAGAAAACCTACCAGGGCAGCTACGGTTTCCG 235

Query 324 TCTGGGCTTCTTGCATTCTGGGACAGCCAAGTCTG-G-CTTGCAAGGT 369  
|||||  
Sbjct 236 TCTGGGCTTCTTGCATTCTGGGACAGCCAAGTCTGTGACTTGACACGGT 283

Swyer-6-exon4  
TP53-control

Query 37 CTGCCGTCCTCAAGCAATGGATGATTTGATGCTGTCCCCGGACGATATTGAACAATGGTT 96  
|||||  
Sbjct 8 CTGCCGTCCTCAAGCAATGGATGATTTGATGCTGTCCCCGGACGATATTGAACAATGGTT 67

Query 97 CACTGAAGACCCAGGTCCAGATGAAGCTCCAGAAATGCCAGAGGCTGCTCCCCCGTGTG 156  
|||||  
Sbjct 68 CACTGAAGACCCAGGTCCAGATGAAGCTCCAGAAATGCCAGAGGCTGCTCCCCCGTGTG 125

Query 157 GCCCCGCACCAGCAGCTCCTACACCGGCGGCCCTGCACCAGCCCCCTCCTGGCCCCTG 216  
|||||  
Sbjct 126 GCCCCGCACCAGCAGCTCCTACACCGGCGGCCCTGCACCAGCCCCCTCCTGGCCCCTG 185

Query 217 TCATCTTCTGTCCCTTCCCAGAAAACCTACCAGGGCAGCTACGGTTTCCGTCTGGGCTTC 276  
|||||  
Sbjct 186 TCATCTTCTGTCCCTTCCCAGAAAACCTACCAGGGCAGCTACGGTTTCCGTCTGGGCTTC 245

Query 277 TTGCATTCTGGGACAGCCAAGTCTG-GACTTGACAG 311  
|||||  
Sbjct 246 TTGCATTCTGGGACAGCCAAGTCTGTGACTTGACAG 281

Swyer-7-exon4  
TP53-control

Query 1 AGTCCCCCTTGCCGTCCTCAAGCAATGGATGATTTGATGCTGTCCCCGGACGATATTGAAC 60  
|||||  
Sbjct 1 AGTCCCCCTTGCCGTCCTCAAGCAATGGATGATTTGATGCTGTCCCCGGACGATATTGAAC 60

Query 61 AATGGTTCCTGAAGACCCAGGTCCAGATGAAGCTCCAGAAATGCCAGAGGCTGCTCCCC 120  
|||||  
Sbjct 61 AATGGTTCCTGAAGACCCAGGTCCAGATGAAGCTCCAGAAATGCCAGAGGCTGCTCCCC 120

Query 121 GCGTGGCCCTGCACCAGCAGCTCCTACACCGGCGGCCCTGCACCAGCCCCCTCCTGGC 180  
|||||  
Sbjct 121 GCGTGGCCCTGCACCAGCAGCTCCTACACCGGCGGCCCTGCACCAGCCCCCTCCTGGC 180

Query 181 CCCTGTATCTTCTGTCCCTTCCCAGAAAACCTACCAGGGCAGCTACGGTTTCCGTCTGG 240  
|||||  
Sbjct 181 CCCTGTATCTTCTGTCCCTTCCCAGAAAACCTACCAGGGCAGCTACGGTTTCCGTCTGG 240

Query 241 GCTTCTTGCATTCTGGGACAGCCAAGTCTGTGACTTGACACGGT 283  
|||||  
Sbjct 241 GCTTCTTGCATTCTGGGACAGCCAAGTCTGTGACTTGACACGGT 283

DSD-GCT-1-exon4  
TP53-control

```
Query 35 CCTTGCCGTCCCAAGCAATGGATGATTTTGATGCTGTCCCGGACGATATTGAACCAATG 94
          |||
Sbjct 7 CCTTGCCGTCCCAAGCAATGGATGA-TTTGATGCTGTCCCGGACGATATTGAA-CAATG 64

Query 95 GTTACTGAAGACCCAGGTCCAGATGAAGCTCCCAGAATGCCAGAGGCTGCTCCCCCGC 154
          |||
Sbjct 65 GTTACTGAAGACCCAGGTCCAGATGAAGCTCCCAGAATGCCAGAGGCTGCTCCCC--C 122

Query 155 GTGGCCCTGCACCAGCAGCTCCTACACCGGGGCCCTGCACCAGCCCCCTCCTGGCCC 214
          |||
Sbjct 123 GTGGCCCTGCACCAGCAGCTCCTACACCGGGGCCCTGCACCAGCCCCCTCCTGGCCC 182

Query 215 CTGTCATCTTCTGTCCCTTCCCAGAAAACCTACCAGGGCAGCTACGGTTTCCGTCTGGGC 274
          |||
Sbjct 183 CTGTCATCTTCTGTCCCTTCCCAGAAAACCTACCAGGGCAGCTACGGTTTCCGTCTGGGC 242

Query 275 TTCTTGCAATTCTGGGACAGCCAAGTCTG 302
          |||
Sbjct 243 TTCTTGCAATTCTGGGACAGCCAAGTCTG 270
```

DSD-GCT-2-exon4  
TP53-control

```
Query 1 CCC-TGCCG-CTCATAGCAATGGATGATTTGTATGCTGT-CCCGG-CGATATTGAACAAT 56
          |||
Sbjct 6 CCCTTGCCGTCCCA-AGCAATGGATGATTTG-ATGCTGTCCCGGACGATATTGAACAAT 63

Query 57 GGTTACTGAAGACCCAGGT-CAGATGAAGCTCCCAGAATGCCAGAGGCGTGCTCCCCC 115
          |||
Sbjct 64 GGTTACTGAAGACCCAGGTCCAGATGAAGCTCCCAGAATGCCAGAGGC-TGCTCCCCC 122

Query 116 GTGGCCCTGCACCAGCAGCTCCTACACCGGGGCCCTGCACCAGCCCCCTCCTGGGC 175
          |||
Sbjct 123 GTGGCCCTGCACCAGC-AGTCCTACACCGGGGCCCTGCACCAGCCCCCTCCT-GGC 180

Query 176 CCCTGTCATCTTCTGTCCCTTCCCAGAAAACCTACCAGGGCAGCTACGGTTTCCGT 235
          |||
Sbjct 181 CCCTGTCATCTT-CTGTCCCT-CCCAG-AAAACCTACCAGGGCAGCTACGG-TTCCGT 236

Query 236 CCTGGGCTTCTTTGCATTCGTGGGGAACAGCCAAAGTCTTGTGACTTTGCACGG 290
          |||
Sbjct 237 C-TGGGCTT-CTT-GCATTC-TGGG-A-CAGCCAA-GTCT-GTGACTT-GCACGG 282
```

DSD-GCT-4-exon4  
TP53-control

```
Query 33 CTTGCCGTCCCCAAGCAATGGATTGATTTGATGCTGTCCCCGGACGATATTGAACAATGG 92
          |||
Sbjct 8 CTTGCCGT-CCCAAGCAATGGA-TGATTTGATGCTGTCCCCGGACGATATTGAACAATGG 65

Query 93 TTCACTGAAGACCCAGGTCCAGATGAAGCTCCCAGAATGCCAGAGGCTGTCCCCCGCG 152
          |||
Sbjct 66 TTCACTGAAGACCCAGGTCCAGATGAAGCTCCCAGAATGCCAGAGGCTGTCCCC--CG 123

Query 153 TGGCCCTGCACCAGCAGCTCCTACACCGGCGCCCTGCACCAGCCCCCTCCTGGCCCC 212
          |||
Sbjct 124 TGGCCCTGCACCAGCAGCTCCTACACCGGCGCCCTGCACCAGCCCCCTCCTGGCCCC 183

Query 213 TGTCACTTCTGTCCCTTCCCAGAAAACCTACCAGGGCAGCTACGGTTCCGTCTGGGCT 272
          |||
Sbjct 184 TGTCACTTCTGTCCCTTCCCAGAAAACCTACCAGGGCAGCTACGGTTCCGTCTGGGCT 243

Query 273 TCTTGCACTTCTGGGACAAGCCAA 295
          |||
Sbjct 244 TCTTGCACTTCTGGGACA-GCCAA 265
```

DSD-GCT-5-exon4  
TP53-control

```
Query 5 TGCCG-CCTTAGCGATGGATGATTTGATGCTGTGTCCCCGGACGATATTGAACAATGGTTC 63
          |||
Sbjct 10 TGCCGTCCAAGCAATGGATGATTTGATGCTGT-CCCCGGACGATATTGAACAATGGTTC 68

Query 64 ACTGAAGACCCAGGTCCAGATGAAGCTCCCAGAATGCCAGAGGCGTGCTCCCCCGTGGC 123
          |||
Sbjct 69 ACTGAAGACCCAGGTCCAGATGAAGCTCCCAGAATGCCAGAGGC-TGCTCCCCCGTGGC 127

Query 124 CCCTGCACCAGCGAGCTCCTACACCGGCGCCCTGCACCAGCCCCCTCCTGGCCCCTGT 183
          |||
Sbjct 128 CCCTGCACCAGC-AGCTCCTACACCGGCGCCCTGCACCAGCCCCCTCCTGGCCCCTGT 186

Query 184 CATCTTCTGTCCCTTCCCAGAAAACCTACCAGGGCAGCTACGGTTCCGTCTGGGCTTCT 243
          |||
Sbjct 187 CATCTTCTGTCCCTTCCCAGAAAACCTACCAGGGCAGCTACGGTTCCGTCTGGGCTTCT 246

Query 244 TGCATTCTGGGACAGCCAAGTCTGTGACTTGCACGGT 280
          |||
Sbjct 247 TGCATTCTGGGACAGCCAAGTCTGTGACTTGCACGGT 283
```

CAIS-8-exon4  
TP53-control

Query 17 GATGATTTGATGCTG-CCCCGG-CGATATTG-ACAATGGTCTACTGAAGACCCAGGTCCA 73  
|||||  
Sbjct 27 GATGATTTGATGCTGTCCCCGGACGATATTGAACAATGGTTCCTACTGAAGACCCAGGTCCA 86

Query 74 GATGAAGCT-CCAGAATGCCAGAGG-Tgcctccccccgt-g-ccct-caccagca-ct-c 126  
|||||  
Sbjct 87 GATGAAGCTCCCAGAATGCCAGAGGCTG-CTCCCCCGTGGCCCTGCACCAGCAGCTCC 145

Query 127 t-c-ccgccgccccctgccccagccccctcctggccccctg-catcttctgccccctTCCaa 183  
| | | | |  
Sbjct 146 TACACCGGCGGCCCTGCACCAGCCCCCTCCTGGCCCTGTATCTTCTGTCCCTTCCCA 205

Query 184 aaaaaCCAACAAGGGCAGCTACGGTTTCCGTCTTGGCCTTCTTGCA-TCTGGGACAGCCA 242  
| | | | |  
Sbjct 206 GAAAACCTACCAGGGCAGCTACGGTTTCCGTCTGGGC-TTCTTGCAATCTGGGACAGCCA 264

Query 243 AGTCTGT 249  
| | | | |  
Sbjct 265 AGTCTGT 271

CAIS-9-exon4  
TP53-control

CAIS-9-exon4 AGTCCCTCTTCCGCTCCAACATGATGGATGATTTGATGCTGTCCCCGGCGATA-TTGAAC 59  
TP53-control AGTCCCCCTTCCGCTCCAAGCAATGATGATTTGATGCTGTCCCCGGACGATATTGAAC 60  
\*\*\*\*\*

CAIS-9-exon4 AATGGTC-ACTGA-AGACCCAGGCCAGATGAAGCTCCCAGAATGCCAGAGCGTGCCCCC 117  
TP53-control AATGGTTCACTGAAGACCCAGGTCCAGATGAAGCTCCCAGAATGCCAGAGGCTGCTCCCC 120  
\*\*\*\*\*

CAIS-9-exon4 GCGTGGCCCTGCAC-CAGCGGCT-CTACACCGGGG-CCCCTCACCAGCCCCCTCCTGGG 174  
TP53-control CCGTGGCCCTGCACCAGCAGCTCCTACACCGGGGCCCCTGCACCAGCCCCCTCCTGGC 180  
\*\*\*\*\*

CAIS-9-exon4 CCCCAGCACCTTCTGCCCTCCAGA--AAACCTACCA-GGGAGCTACGGTTTCCGCTTGG 231  
TP53-control CCCTGTATCTTCTGTCCCTTCCCAGAAAACCTACCAGGGCAGCTACGGTTTCCGCTTGG 240  
\*\*\*

CAIS-9-exon4 C-TTCTTGATGGGGACACC---AAGCTGTGAGTGGACGGGCAGTGGCCTAGGGCTGTCT 286  
TP53-control GCTTCTTGCAATCTGGGACAGCCAAGTCTGTGACTTGCACGGT----- 283  
\*\*\*\*\*

CAIS-GCT-exon4  
TP53-control

CAIS-GCT-exon4 -----CCCTCGCGCTTAAGTATGGATGATTTGATCTGCCCGGCGATATTGAAC 49  
TP53-control AGTCCCCCTTCCGCTCCAAGCAATGATGATTTGATGCTGTCCCCGGACGATATTGAAC 60  
\*\*\*\*\*

CAIS-GCT-exon4 AATGGTCACTG-AAGACCCAG-GCCAGATGAAGCTCCAGAATCCAGAGCGC----- 98  
TP53-control AATGGTTCACTGAAGACCCAGGTCCAGATGAAGCTCCCAGAATGCCAGAGGCTGCTCCCC 120  
\*\*\*\*\*

CAIS-GCT-exon4 CCCCCCGTGCCTCACCACGCCTCTCACCGGGGGCCCCTGCCAGCCCCCTCCTGGC 158  
TP53-control CCGTGGCCCTGCACCAGCAGCTCCTACACCGGGGGCCCCTGCACCAGCCCCCTCCTGGC 180  
\*\*\*\*\*

CAIS-GCT-exon4 CCCTGC--ATTTTGCCTTCCCAGAAAACCAACAAGGGCAGCTACGGTTTCCGCTTGG 216  
TP53-control CCCTGTATCTTCTGTCCCTTCCCAGAAAACCTACCAGGGCAGCTACGGTTTCCGCTTGG 240  
\*\*\*\*\*

CAIS-GCT-exon4 274  
TP53-control 283  
CTT--CTGCATTCTGGGACAGCCAAGCCTGTACTTGGACGGGCAAGTGCCTGAGGGCTG  
GCTTCTTGCACTCTGGGACAGCCAAGTCTGTGACTTGCACGGT-----  
\* \*\*\*\*\*

Turner-3-exon4  
TP53-control

Query 3 CCGTGCCGGCCCTAGCGATGGATGATTGTATGCTGTCCCCGG-CGATATTGAACAATGG 61  
|| ||||| ||| ||| |||||||||||| |||||||||||| ||||||||||||  
Sbjct 7 CCTTGCCGTCCCAAGCAATGGATGATTG-ATGCTGTCCCCGGACGATATTGAACAATGG 65

Query 62 TTCACTGAAGACCCAGGTCCAGATGAAGCTCCCAGAATGCCAGAGG-TGTCCCTCCCCCGG 120  
|| ||||||||||||||||||||||||||||||||||| || |||||||||  
Sbjct 66 TTCACTGAAGACCCAGGTCCAGATGAAGCTCCCAGAATGCCAGAGGCTG--CTCCCCCGG 123

Query 121 TGCCCCCTGCACCCAGCGCCTCTACACCCGGGGCGCCCCCTGGCCCCCAGGCCCTCCT 180  
|| ||||||||| ||| ||||||||| || ||||| || | || || |||||  
Sbjct 124 TGGCCCCCTGCACC-AGCAGCTCTACACC-GG-CGGCCCC-TG-CACC-AGCCCCCTCCT 177

Turner-4-exon4  
TP53-control

Query 1 CCCTTG-CG-CTCATGC-ATGGATGATTGTGATGCTGTCCCCGG-CGATATTGAACAATGG 56  
||| || | ||| ||| |||||||||||||| |||||||||||| ||||||||||||  
Sbjct 6 CCCTTGCCGTCCCAAGCAATGGATGATTGTGATGCTGTCCCCGGACGATATTGAACAATGG 65

Query 57 -TCACTGAAGACCCAGGTCCAGATGAAGCTCCCAGAATGCCAGAGGCTGTCCCCCGTG 115  
|| ||||||||||||||||||||||||||||||||||| ||||||||||||  
Sbjct 66 TTCACTGAAGACCCAGGTCCAGATGAAGCTCCCAGAATGCCAGAGGCTGTCCCCCGTG 125

Query 116 GCCC-T-CACCAGCGGCT-CTACACCGGGCGCCCCT-CACCAGCCCCCTTCTGGCCCCTG 171  
|||| | ||||| ||| |||||||||||||| |||||||||||| |||||||||  
Sbjct 126 GCCCCTGCACCCAGCAGCTCTACACCGGGCGCCCCTGCACCCAGCCCCCTCCTGGCCCCTG 185

Query 172 T-A-CTTCTGTCC--TCCCAGAAACCTACCAGG-CAGCTACGGTT-CCGTCTGG-CTTC 224  
| | ||||||| |||||||||||||| ||||||||| ||||| |||||  
Sbjct 186 TCATCTTCTGTCCCTTCCCAGAAACCTACCAGGCAGCTACGGTTTCCGTCTGGGCTTC 245

Query 225 TT-CAT-C-GGGACAGCCAAGCCTGTGA-TTGCAACGG 258  
|| || | |||||||||||| ||||| ||||| |||  
Sbjct 246 TTGCATTCTGGGACAGCCAAGTCTGTGACTTGCA-CGG 282

Turner-6-exon4  
TP53-control

Query 18 AGTCCCTTCTTGCCGTCCCA--CAATGGATGATTGTGATGCTGTCCCCGG-C-ATATTGAAC 73  
|||| ||||||||| |||||||||||||| |||||||||||| | |||||  
Sbjct 1 AGTCCCCCTTGCCGTCCCAAGCAATGGATGATTGTGATGCTGTCCCCGGACGATATTGAAC 60

Query 74 AATGGTTCACCTGAAGACCCAGGTCCAGATGAAGCTCCCAGAAT-CCAG-GGCTGCT-CCC 130  
|| ||||||||||||||||||||||||||||||||||| ||| ||||| |||||  
Sbjct 61 AATGGTTCACCTGAAGACCCAGGTCCAGATGAAGCTCCCAGAATGCCAGAGGCTGTCCCC 120

Query 131 CCGTGG-CCCTG-ACCAGCAGCTCCTACACCGGCGGCC-TC-ACCAG-CCCCTCCT-GC 184  
||||| ||||| ||||||||||||||||||||||||| || ||||| ||||||| ||  
Sbjct 121 CCGTGGCCCTGCACCAGCAGCTCCTACACCGGCGGCCCTGCACCAGCCCCCTCCTGGC 180

Query 185 CCCTGTCATCTTCTGTCCCTTCCCAG-AAACCTACCAGGGCAGCTACGGTTTCCGTCTGG 243  
||||||||||||||||||||||| |||||||||||||||||||||||||||||  
Sbjct 181 CCCTGTCATCTTCTGTCCCTTCCCAGAAAACCTACCAGGGCAGCTACGGTTTCCGTCTGG 240

Query 244 -CTTCT-G-ATTCTGGG 257  
||| | |||||  
Sbjct 241 GCTTCTTGCATTCTGGG 257

Turner-11-exon4  
TP53-control

Query 16 ATGGATGATTTGATGCTGTCCCCGG-CGATATTGAACAATGGTTCCTGAAGACCCAGGT 74  
||||||||||||||||||||||| |||||||||||||||||||||||||||||  
Sbjct 24 ATGGATGATTTGATGCTGTCCCCGGACGATATTGAACAATGGTTCCTGAAGACCCAGGT 83

Query 75 CCAGATGAAGCTCC-AGA-TGCCAGAGCGTGCCCCCGGTGGCCCCCTGCACCAGCAGCT 132  
||||||||||| ||| ||||| ||| ||| |||||||||||||||||||||  
Sbjct 84 CCAGATGAAGCTCCCAGAATGCCAGAGGCTGCTCCCCCGGTGGCCCCCTGCACCAGCAGCT 143

Query 133 CCTACACCGGCGGCCCTGC-CCAGCCCCCTCCTGGGCCCTG-CATCTTCTGGTCCCTTC 190  
||||||||||||||||||||||| ||||||||||||| ||||| ||||||| |||||  
Sbjct 144 CCTACACCGGCGGCCCTGCACCAGCCCCCTCCTGG-CCCCTGTCATCTTCTGTCCCTTC 202

Query 191 CCAGAAAAC-TACCAGG-CAGCTACGG-TTCCGGCTGGGCTTATTGCATTG-GGGACA-C 245  
||||||| ||||| ||||||| ||||| ||||||| ||||| ||||| |  
Sbjct 203 CCAGAAAACCTACCAGGGCAGCTACGGTTTCCGTCTGGGCTTCTTGCATTCTGGGACAGC 262

Query 246 CAAG-CTGTGA 255  
||| |||||  
Sbjct 263 CAAGTCTGTGA 273
